# Supplementary material for: Human Cerebral Organoids Reveal Early Spatiotemporal Dynamics and Pharmacological Responses of UBE3A
Source: PubMed Central journal article supplement — Stem Cell Reports. 2020 Sep 10;15(4):845–54. doi: 10.1016/j.stemcr.2020.08.006 (PMC7561513; doi:10.1016/j.stemcr.2020.08.006), 2020-09-10
Supplement: mmc1.pdf [file mmc1.pdf]

**Stem Cell Reports, Volume 15**

**Supplemental Information**

**Human Cerebral Organoids Reveal Early Spatiotemporal Dynamics and  
Pharmacological Responses of UBE3A**

**Dilara Sen, Alexis Voulgaropoulos, Zuzana Drobna, and Albert J. Keung**

**SUPPLEMENTAL FIGURES AND LEGENDS**

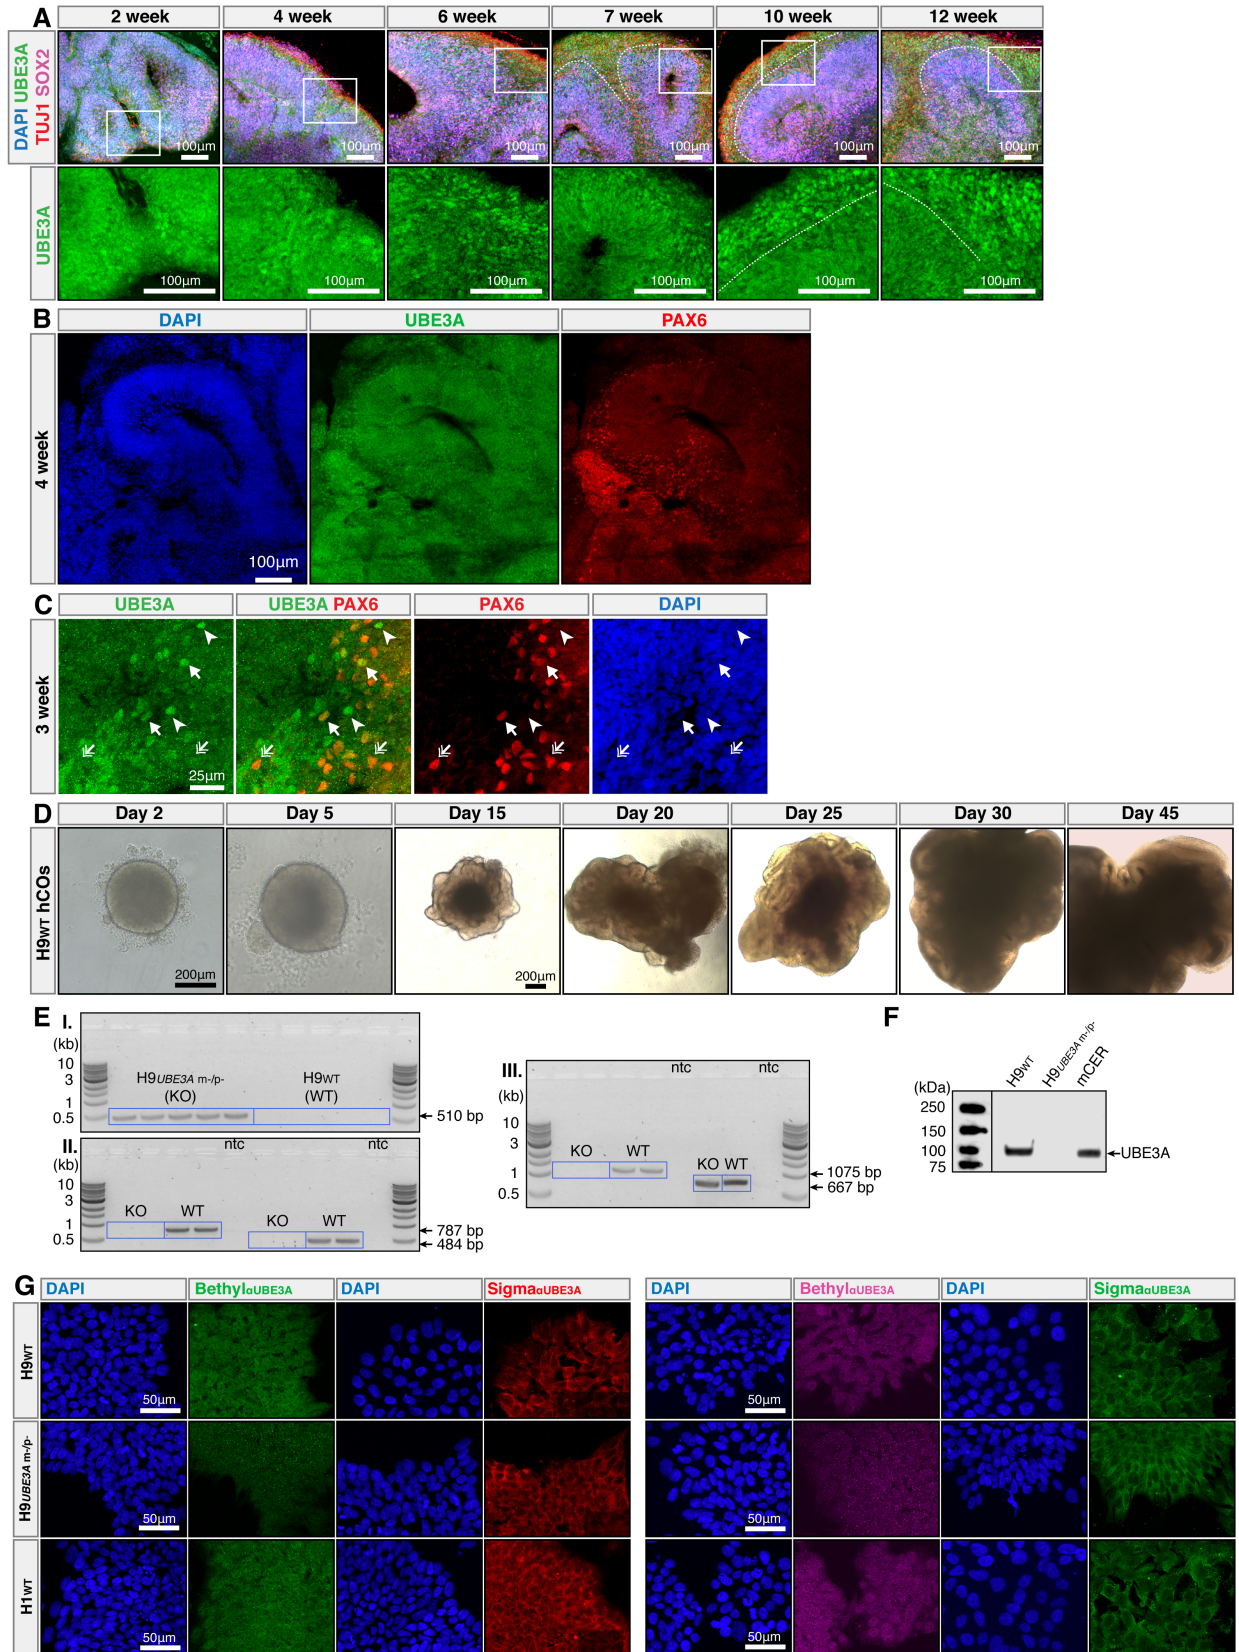

**Figure S1. Additional time-points in hCO development revealing the weak to strong nuclear UBE3A transition in neurons and antibody validation experiments, Related to Figure1.**

(A) Immunostaining time course of neurotypical H9-derived hCO neurodevelopment. Dotted white lines delineate boundaries between TUJ1+ and SOX2+ cells. (B) Low magnification images showing PAX6 progenitor organization (C) Strong (arrows) and weak (double arrows) nuclear UBE3A in PAX6+ cells. Strong nuclear UBE3A in PAX6- /weak cells (arrow heads). (D) Macroscopic brightfield images showing overall H9 hCO development. (F-G) Validation of the H9<sup>UBE3Am-/p-</sup> cell line. (E) PCR using genomic DNA as template. Primers targeting the junction at the deletion site (I), primers targeting intronic regions in the deleted region (II, III-left), primers targeting intronic *TBP* (III-right). (F) Immunoblot analysis of UBE3A in whole cell lysates of H9<sup>WT</sup>, H9<sup>UBE3Am-/p-</sup> hESCs and cerebellum of C57BL/6 mouse (mCER). (G) Immunostaining of H9<sup>WT</sup>, H9<sup>UBE3Am-/p-</sup>, H1 hESCs and hiPSCs with two different UBE3A antibodies (Bethyl Laboratories A300-351A and Sigma Aldrich SAB1404508) and with two different secondary antibody sets (Right panel: rabbit488 and mouse 546. Left panel: rabbit647 and mouse488). SAB1404508 showed higher background staining in human pluripotent cells compared to mouse sections (data not shown).

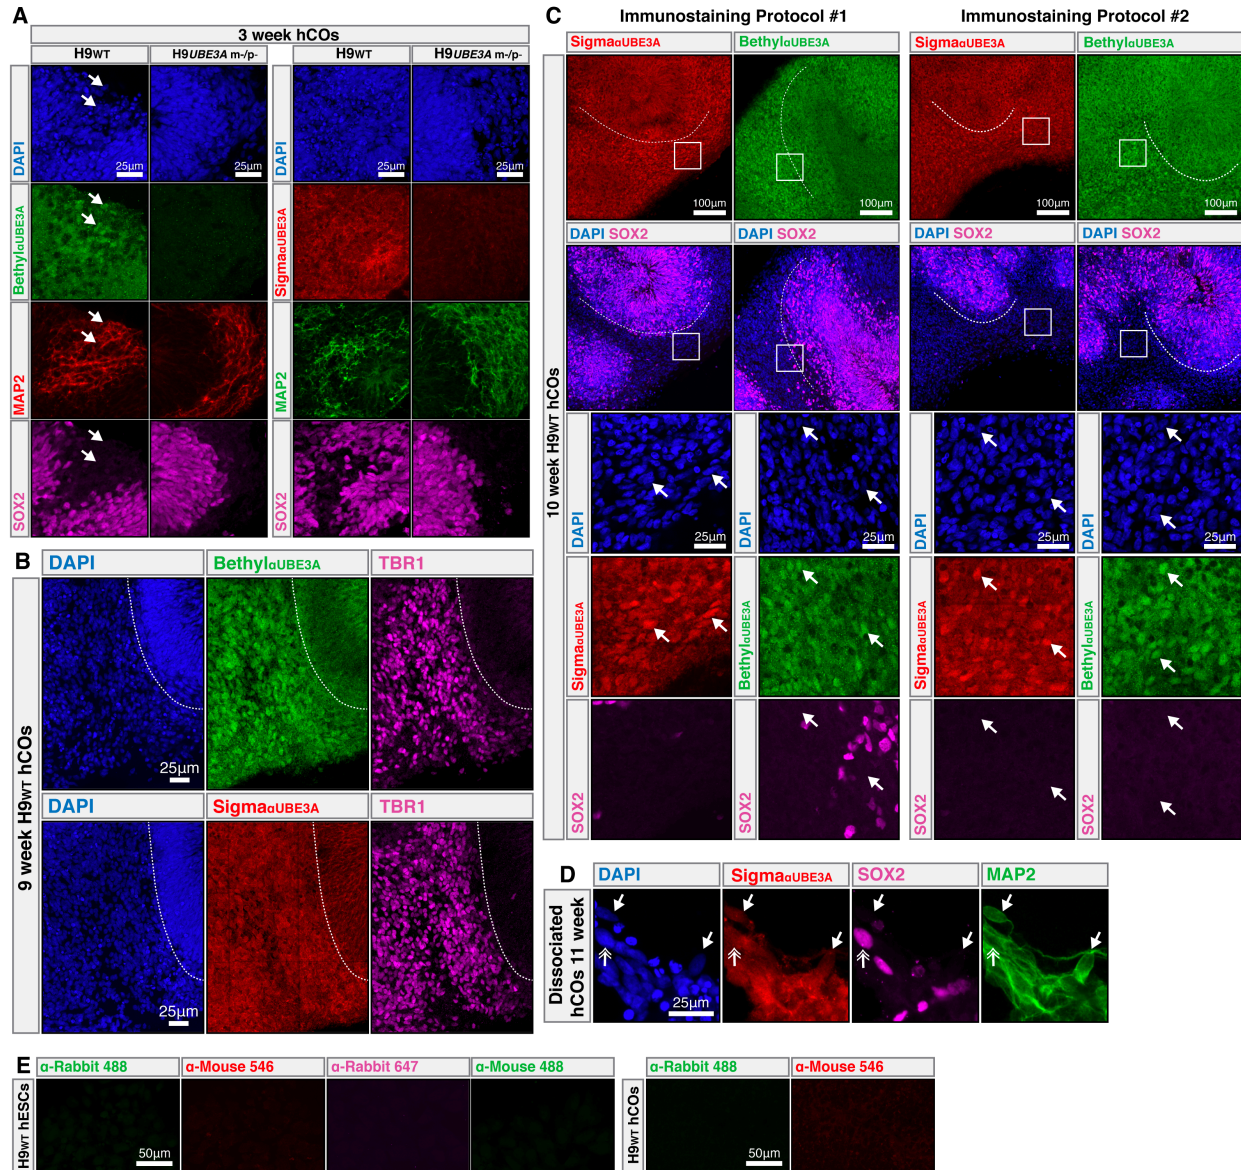

**Figure S2. Additional UBE3A antibody and immunostaining protocol validation, Related to Figure 1.**

(A) H9<sup>WT</sup> and H9<sup>UBE3A<sup>m/p</sup></sup>- derived organoids immunostained with two different UBE3A antibodies (Bethyl Laboratories A300-351A and Sigma Aldrich SAB1404508). Nuclear UBE3A in neurons (arrows). (B) Immunostaining images of 9 week H9<sup>WT</sup> hCOs comparing Sigma and Bethyl UBE3A antibody staining patterns. Dotted white lines delineate the boundaries of TBR1<sup>+</sup> neuronal regions. (C) Comparison of two distinct but similar immunostaining protocols. Protocol 1: Keung Lab protocol described in experimental procedures. Protocol 2: Described previously by Judson and colleagues (Judson et al., 2014). Dotted white lines delineate the boundaries of SOX2<sup>+</sup> progenitor regions. Nuclear UBE3A in potentially neuronal regions (arrows). (D) 2D immunostaining of dissociated H9 hCOs with Sigma UBE3A antibody (SAB1404508). Nuclear UBE3A in neurons (arrows), weaker diffuse staining in progenitors (double arrows). (E) H9 hESCs and H9 hCOs immunostained with secondary antibodies only.

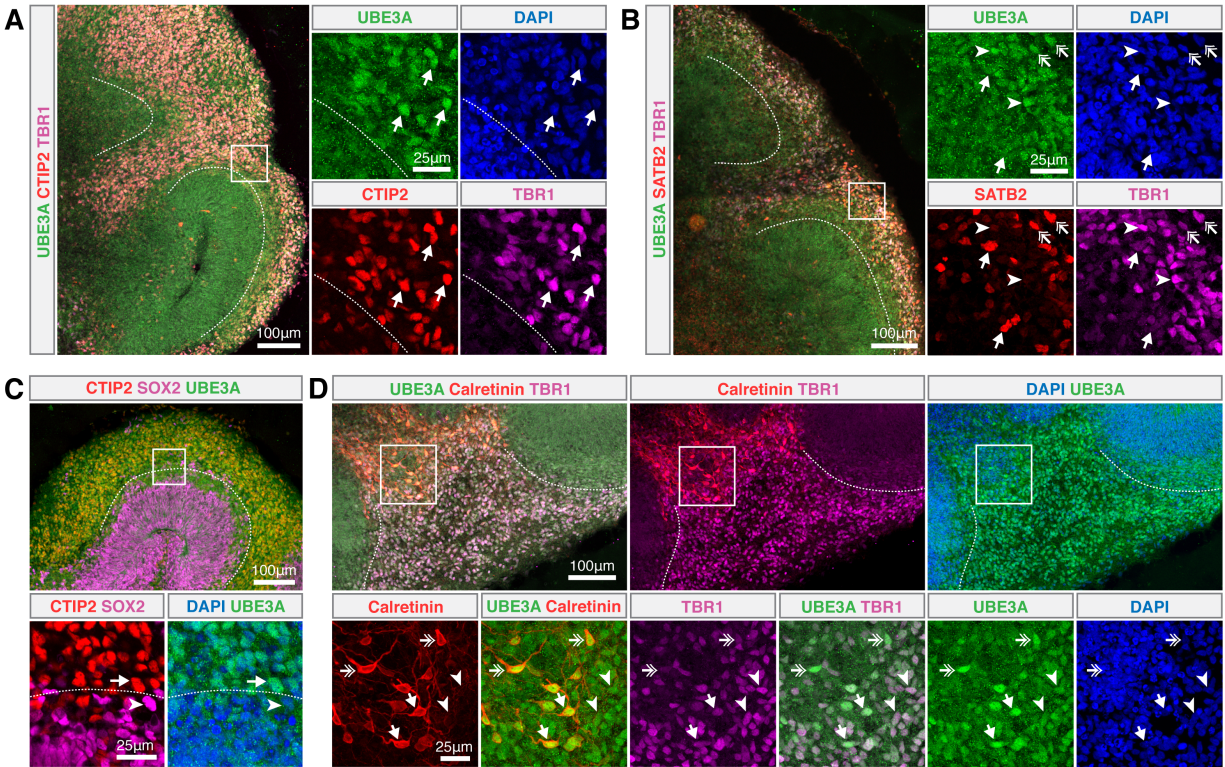

**Figure S3. UBE3A in cerebral cortex-like regions and progenitor zones, Related to Figure2.**

(A-D) UBE3A in cortical cells in neurotypical hCOs. (A, arrows) CTIP2, TBR1 and strong nuclear UBE3A co-localize. (B) Strong nuclear UBE3A in TBR1+/SATB2+ (double arrows) and TBR+/SATB2- (arrow heads) cells. The signal from UBE3A in the nuclei is weaker in TBR1-/SATB2+ (arrows) cells. (C) Strong nuclear UBE3A in CTIP2+ neurons (arrow). Weaker nuclear UBE3A in SOX2+ progenitors (arrow head). (D) Strong nuclear UBE3A in TBR1+/Calretinin+ (arrows), TBR1weak/Calretinin+ (double arrows) and TBR+/Calretinin- (arrow heads) cells.

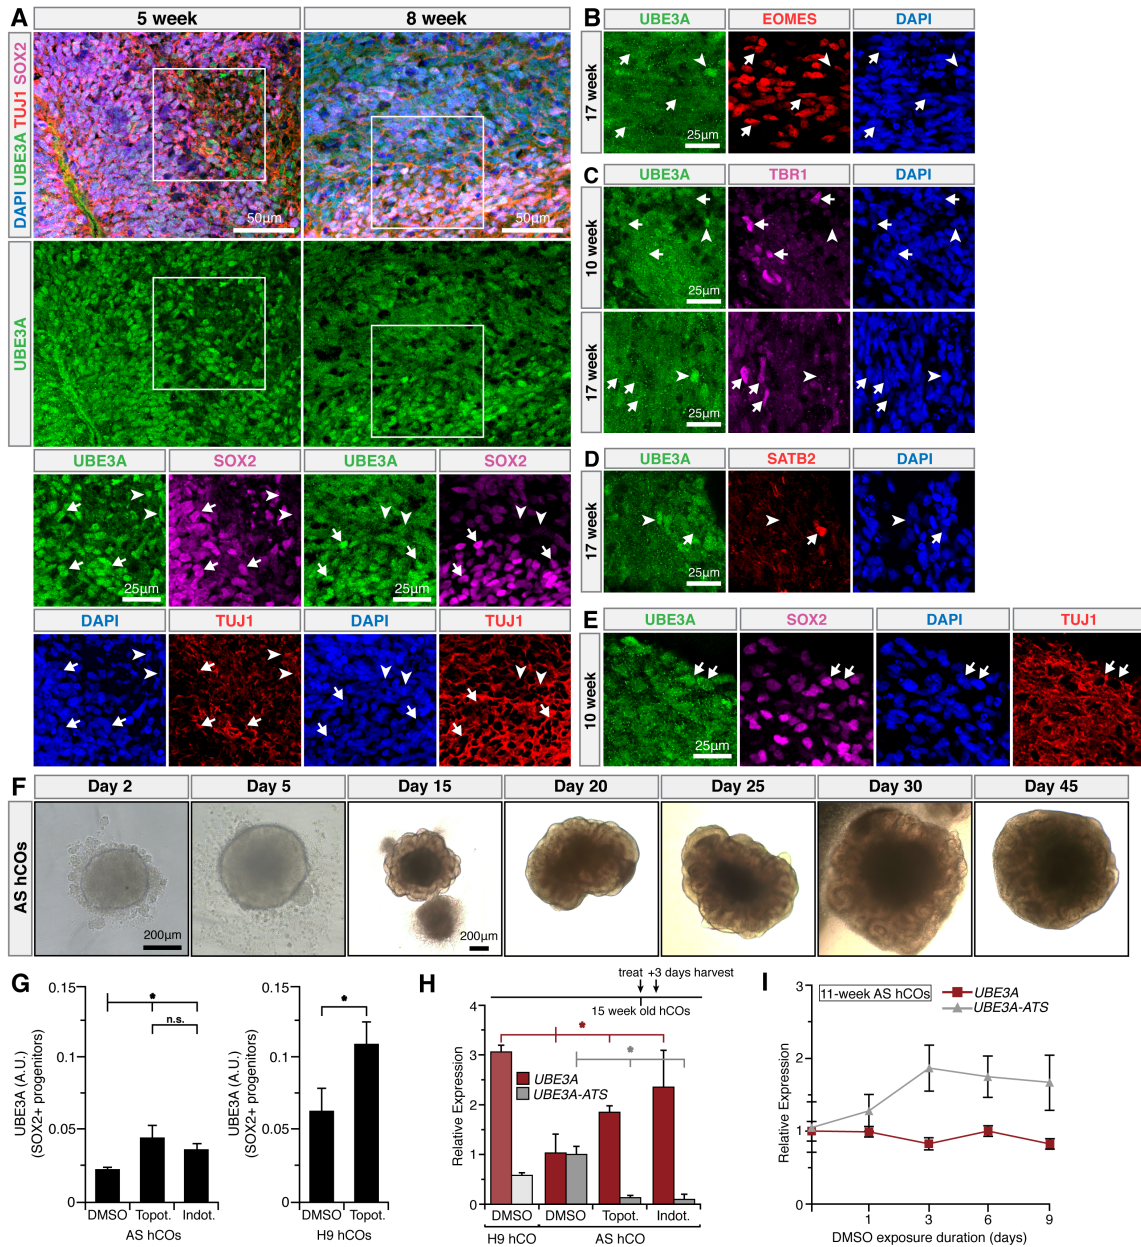

**Figure S4. Paternal UBE3A expression dynamics during AS hCO development and transcriptional and functional responses to topoisomerase inhibitors, Related to Figures 3 and 4.**

(A) Strong nuclear UBE3A in 5-8 week SOX2+ progenitors (arrows). Strong nuclear UBE3A in TUJ1+/SOX2- neurons at 5 weeks becomes weaker at 8 weeks (arrowheads). (B) Weak nuclear UBE3A in EOMES+ cells (arrows). Strong nuclear UBE3A in some EOMES- cells (arrowhead). (C) Weak nuclear UBE3A in TBR1+ cells (arrows). Strong nuclear UBE3A in some TBR1- cells (arrow heads). (D) Weak nuclear UBE3A in SATB2+ cells (arrow). Strong nuclear UBE3A in some SATB2- cells (arrowhead). (E) Strong nuclear UBE3A in SOX2+/TUJ1+ immature neurons (arrows). (F) Macroscopic brightfield images showing overall AS hCO development. (G) Immunostaining quantification of UBE3A in SOX2+ cells after treatment with topoisomerase inhibitors. (H) *UBE3A* and *UBE3A-ATS* expression in 15 week AS hCOs 3 days after a single drug treatment. (I) *UBE3A* and *UBE3A-ATS* expression after 1-9-days of continuous vehicle (DMSO) treatment in 11 week AS hCOs. Statistics; for (G-I) \* $P < 0.05$ , n.s. not significant, full tick marks compared to half tick marks by one-way ANOVA with Tukey-Kramer post hoc,  $n = 3$  independent experiments with 3-5 organoids in each replicate, error bars = 95% confidence intervals. A.U. arbitrary fluorescence units.

## SUPPLEMENTAL EXPERIMENTAL METHODS AND MATERIALS

### Histology and Immunofluorescence

Tissues were fixed in 4% paraformaldehyde for 15min at 4 °C followed by 3 x 10 minute PBS washes. Tissues were allowed to sink in 30 % sucrose overnight and then embedded in 10 % gelatin/7.5 % sucrose. Embedded tissues were frozen in an isopentane bath between -50 and -30 °C and stored at -80 °C. Frozen blocks were cryosectioned to 30- $\mu$ m. For immunohistochemistry, sections were blocked and permeabilized in 0.3 % Triton X-100 and 5 % normal donkey serum in PBS. Sections were incubated with primary antibodies in 0.3 % Triton X-100, 5 % normal donkey serum in PBS overnight at 4 °C in a humidity chamber. Sections were then incubated with secondary antibodies in 0.3 % Triton X-100, 5 % normal donkey serum in PBS for 2h at RT, and nuclei were stained with DAPI (Invitrogen). Slides were mounted using ProLong Antifade Diamond (Thermo Fisher Scientific). Secondary antibodies used were donkey Alexa Fluor 488, 546 and 647 conjugates (Invitrogen, 1:500).

Antibody validation experiments were conducted using *UBE3A* double knock-out H9 cells (H9<sup>*UBE3A* m-/p-</sup>) and hCOs (Figure S1 and S2). Two different commercially available UBE3A antibodies were tested for immunostaining (Sigma-Aldrich, mouse monoclonal, SAB1404508, referred to as Sigma, and Bethyl Laboratories, rabbit polyclonal, A300-351A, referred to as Bethyl). Our results showed that the Sigma antibody had a stronger background signal in the pluripotent stage compared to the Bethyl antibody (Figure S1G). However, once the cells passed the pluripotent stage, both antibodies performed similarly in terms of capturing important localization changes in the cell types of interest (Figure S2A-D). In addition, a very similar, previously described protocol for UBE3A immunostaining with minimal differences was also tested (Judson et al., 2014). The two protocols did not show significant differences (Figure S2C). Immunostaining experiments in the main figures of this work were carried out using the Bethyl antibody.

Images were taken using a Nikon A1R confocal microscope (Nikon Instruments). High magnification images captured using thin (1.5  $\mu$ m) optical sectioning. All samples within experiments were processed at the same time, imaged using the same microscope settings, and adjusted identically for quantification purposes. Quantifications were performed manually except for Figures 4C and S4G, where a CellProfiler pipeline automated the identification first of nuclei using DAPI, then DAPI that were positive for each marker protein, and finally the mean background intensity of UBE3A was subtracted from the nuclear UBE3A intensity. For all quantifications, intensities of all channels were maintained equally across all images. For displayed images, individual channels were balanced equally across the entire image. In manual image quantifications, up to 50 cells from 5 different regions in each hCO were analyzed.

Primary antibodies used in immunostaining experiments are listed below.

| Antigen    | Host    | Supplier            | Cat. No.    | RRID        | Dilution |
|------------|---------|---------------------|-------------|-------------|----------|
| SOX2       | Goat    | R&D systems         | AF2018      | AB_355110   | 1:20     |
| TUJ1       | Mouse   | Sigma Aldrich       | T8578       | AB_1841228  | 1:100    |
| TUJ1       | Rabbit  | Sigma Aldrich       | T2200       | AB_262133   | 1:100    |
| UBE3A      | Rabbit  | Bethyl Laboratories | A300-351A   | AB_185563   | 1:250    |
| UBE3A      | Mouse   | Sigma-Aldrich       | SAB1404508  | AB_10740376 | 1:1000   |
| MAP2       | Mouse   | Millipore Sigma     | M1406       | AB_477171   | 1:250    |
| MAP2       | Rabbit  | Millipore Sigma     | AB5622      | AB_91939    | 1:500    |
| TBR1       | Chicken | Sigma Aldrich       | WH0010716M1 | AB_1843877  | 1:100    |
| EOMES      | Mouse   | R&D systems         | MAB6166     | AB_10919889 | 1:25     |
| CTIP2      | Rat     | Abcam               | ab18465     | AB_2064130  | 1:100    |
| SATB2      | Mouse   | Abcam               | ab51502     | AB_882455   | 1:100    |
| Calretinin | Mouse   | Millipore Sigma     | MAB1568     | AB_94259    | 1:100    |
| Calretinin | Rabbit  | Abcam               | Ab702       | AB_305702   | 1:100    |
| GFP        | Chicken | Abcam               | ab13970     | AB_300798   | 1:500    |

## Preparation of whole cell lysate, nuclear and cytosolic extracts and Immunoblot analysis

The whole cell lysates from H9 (wild type cells), H9<sup>UBE3A m-/p-</sup> (*UBE3A* double KO cells) and mouse cerebellum (mCER) derived from C57BB/6 mouse were prepared as previously described (Drobná et al., 2010). Briefly, tissue of mCER was homogenized and H9 cells lysed in an ice-cold RIPA buffer (50 mM Tris.HCl (pH 7.4), 1% NP-40, 150 mM NaCl, 0.25% Na-deoxycholate, 1 mM EDTA, 1 mM PMSF, 1 mM NaF, and 1X HALT, a cocktail of proteases inhibitors). Lysates were cleared by centrifugation at 10,000 x g. Protein concentrations were determined using BCA assay (ThermoFisher). Equal amount of proteins (35 µg in total) were mixed with 10X Laemmli sample buffer (0.5 M Tris.HCl (pH 6.8), 20% Glycerol, 20% SDS, 0.02% Bromphenol blue, 10% 2-Mercaptoethanol) and incubated at 95 °C for 5 min before separated on 4-15% TGX gel (BioRad). Proteins were transferred onto PVDF membrane (BioRad) and membrane was blocked with 5% non-fat milk (BioRad) in TBS buffer.

The membranes were treated with the following UBE3A antibodies: mouse monoclonal antibody from Sigma (E8655) and rabbit polyclonal antibody from Bethyl Laboratories (A300-351A). β-actin and Lamin B1 were used as a loading control. The antigen-antibody complexes were visualized after incubation with the corresponding HRP-conjugated antibodies and by enhanced chemiluminescence detection (BioRad, Clarity Western ECL Substrate) using Licor Odyssey Fc imaging system.

Nuclear and cytoplasmic extracts were prepared as previously described (Drobná et al., 2003). Organoids in different stages of the development (2-, 6-, and 9-weeks old) were first treated with Accutase (Stem Cell Technologies) to dissociate them into single cells. Samples were collected in duplicate and each replicate comprised 15-25 organoids. Cell suspensions were washed twice with ice-cold DPBS containing 1 mM DTT and 1X HALT inhibitors (Fisher Scientific). Washed organoids were lysed on ice using cytoplasmic extraction buffer (10 mM Tris.HCl (pH 7.4), 60 mM KCl, 1 mM EDTA, 1 mM DTT, 1X HALT) and incubated on ice for 10 min. Igepal CA-630 (Sigma) was added to cell lysate to a final concentration of 1%, vortexed, and centrifuged at 12,000 x g for 5 min at 4 °C. Soluble cytoplasmic extracts (CE) were separated and gently washed with cytoplasmic extraction buffer without Igepal CA-630. Each nuclear fraction was then resuspended in nuclear extraction buffer (20 mM Tris.HCl (pH 8.0), 400 mM NaCl, 1.5 mM MgCl<sub>2</sub>, 25% glycerol, 1 mM DTT, 1X HALT). The nuclear extracts (NE) were kept on ice for 1 hour with occasional vortexing before clarification by centrifugation at 12,000 x g for 5 min at 4 °C. Cytoplasmic and nuclear extracts were stored at -80 °C. The concentration of proteins in extracts were determined by BCA assay (ThermoFisher). 15 µg of protein from CE and NE were combined with Laemmli sample buffer and, after heat denaturation, separated on a 4-15% TGX gel (BioRad). Proteins were transferred onto a PVDF membrane (BioRad) and the membrane was blocked with 5% non-fat milk (BioRad) in TBS buffer.

The membranes were treated with the UBE3A antibody. GAPDH and H3 were used as a loading controls for cytoplasmic and nuclear extracts, respectively. The membranes were visualized by enhanced chemiluminescence detection (BioRad, Clarity Western ECL Substrate) using a LiCor Odyssey Fc imaging system. Calculation of the UBE3A CE/NE ratio was based on the total yield of proteins in each fraction and adjusted to the amount of proteins loaded on the gel. The following formulas were used for evaluation of UBE3A in each fraction and for the UBE3A CE/NE ratio:

$$\Sigma \text{CE (or NE)} = \text{Signal Intensity} \times \frac{\text{Total yield of proteins for CE (or NE)} (\mu\text{g})}{\text{Total proteins loaded to the gel} (15\mu\text{g})}$$

$$\text{Ratio} = \frac{\Sigma \text{CE}}{\Sigma \text{NE}}$$

Immunoblot analysis in this work was completed with the Sigma (E8655) UBE3A antibody due to its better labeling efficiency in this particular analysis (comparison data not shown). Primary and secondary antibody details used in immunoblot analysis are listed below.

| Antigen | Host   | Supplier      | Cat. No. | RRID       | Dilution/Working concentration |
|---------|--------|---------------|----------|------------|--------------------------------|
| UBE3A   | Mouse  | Sigma-Aldrich | E8655    | AB_261956  | 2 µg/ml                        |
| GAPDH   | Mouse  | Calbiochem    | CB1001   | AB_2107426 | 2 µg/ml                        |
| H3      | Rabbit | Abcam         | ab1791   | AB_302613  | 1 µg/ml                        |



|                           |        |                             |          |             |              |
|---------------------------|--------|-----------------------------|----------|-------------|--------------|
| $\beta$ -actin            | Mouse  | Santa Cruz<br>Biotechnology | sc47778  | AB_2714189  | 1:2500       |
| Lamin B1                  | Rabbit | Abcam                       | ab16048  | AB_10107828 | 1 $\mu$ g/ml |
| m-IgG $\kappa$ BP-<br>HRP | Mouse  | Santa Cruz<br>Biotechnology | sc516102 | AB_2687626  | 1:2500       |
| anti-rabbit<br>IgG-HRP    | Mouse  | Santa Cruz<br>Biotechnology | sc2357   | AB_628497   | 1:2500       |

### Transfection of HEK 293FT cells, lentiviral particle production and transduction of human cerebral organoids

To generate lentiviral particles, HEK 293FT cells (ThermoFisher) were seeded on a 6-well plate at a density of  $5.0 \times 10^6$  cells/ml in complete cultured media (DMEM with high glucose containing 10% FBS and non-essential amino acids; Corning). When cells reached 80% confluence, the medium was replaced with Opti-MEM reduced serum medium containing GlutaMax (ThermoFisher) and exposed to 25  $\mu$ M chloroquine diphosphate (Sigma-Aldrich) for 5 hours before being transfected with the plasmid mixture. The plasmid mixture consisted of pLenti-CamKIIa-GFP (Addgene, Plasmid #96941), pCMVR8.74 (packaging plasmid, Addgene, Plasmid #22036), pCMV-VSV-G (envelope plasmid, Addgene, Plasmid #8454), and pAdVantage vector (Promega, E1711) each at 300 fmol. Polyethyleneimine (PEI, Sigma) was used as the transfection reagent at a ratio of 3:1 (PEI:DNA). PEI was combined with the plasmid mixture, incubated for 20 minutes at room temperature, and spread drop-wise over the culture. A fresh media change was performed after 18 hours. Media containing lentiviral particles were harvested 48 and 72 hours post transfection, spun down at 500 g for 5 min and filtered using 0.45  $\mu$ m PES syringe filters (VWR). The particles were concentrated by centrifugation at 2,500 g for 15 min using Amicon Ultra-15 centrifugal filter units (EMDMillipore, UFC910008). Concentrated lentivirus was aliquoted and stored at -80°C. hCOs were transduced by incubating 100 $\mu$ L pLenti-CamKIIa-GFP virus in 1mL cerebral organoid differentiation media for 12 hours.

### RNA extraction and qPCR

hCOs were washed 3 times in cold PBS. Matrigel was dissolved by incubating the hCOs in chilled Cell Recovery Solution (Corning, cat. no. 354253) for 1h at 4 °C. The dissolved Matrigel was removed by rinsing 3 times in cold PBS. Total RNA was isolated using Direct-zol RNA MicroPrep Kit (Zymo Research) according to the manufacturer's protocol. RNA samples were collected in 2mL RNase-free tubes and chilled on ice throughout the procedure. cDNA synthesis was performed using 900 ng of total RNA and the iScript Reverse Transcription Kit (BIO-RAD) according to the manufacturer's protocol. qPCR reactions were performed using IQ Multiplex Powermix (BIO-RAD) on a BIO-RAD 384-well machine (CXF384) with PrimePCR probe assays (BIO-RAD). Unique assay IDs for *UBE3A* primers and probe: qHsaCIP0031486. Primer pairs and probes for *UBE3A-ATS* (RT-17 designed by Runte and colleagues) (Runte et al., 2001), *HPRT* and *TBP* were custom designed and are listed below. Individual primer pairs and probes were tested before multiplexing reactions. Analysis of *UBE3A* and *UBE3A-ATS* expression along with two reference genes *TBP* and *HPRT* was performed in triplicate using Excel by calculating the  $\Delta\Delta C_t$  value. Data are presented as expression level ( $2^{-\Delta\Delta C_t}$ ) relative to *TBP* or *HPRT*. For each qPCR sample, 3 independent experiments (n=3) with 3-5 organoids in each replicate from different culture dishes were collected.

Primers used in RT-qPCR experiments are listed below.

| Target           | Gene ID   | Forward primer              | Reverse primer              | Probe                              | Amplicon size |
|------------------|-----------|-----------------------------|-----------------------------|------------------------------------|---------------|
| <i>UBE3A-ATS</i> | 104472715 | GGCACTGAAAAT<br>GTGGCATCCAG | GGTGTGTCAGCT<br>GTGCTGGTGTC | AGCCAAAGAGTACTC<br>TTCTCAGTCATCCT  | 120           |
| <i>TBP</i>       | 6908      | GGGACCACTCC<br>ACTGTATC     | CGAAGTGCAATG<br>GTCTTTAGG   | ATGACTCCCATGACC<br>CCCATCACTCCT    | 100           |
| <i>HPRT</i>      | 3251      | TGACACTGGCAA<br>AACAAATGCA  | GGTCCTTTTCAC<br>CAGCAAGCT   | TGCTTTTCCTTGGTCAG<br>GCAGTATAATCCA | 94            |

## SUPPLEMENTAL REFERENCES

Drobná, Z., Jaspers, I., Thomas, D.J., and Stýblo, M. (2003). Differential activation of AP-1 in human bladder epithelial cells by inorganic and methylated arsenicals. *FASEB J.* *17*, 67–69.

Drobná, Z., Walton, F.S., Paul, D.S., Xing, W., Thomas, D.J., and Stýblo, M. (2010). Metabolism of arsenic in human liver: The role of membrane transporters. *Arch. Toxicol.* *84*, 3–16.

Runte, M., Hüttenhofer, A., Groß, S., Kiefmann, M., Horsthemke, B., and Buiting, K. (2001). The IC-SNURF–SNRPN transcript serves as a host for multiple small nucleolar RNA species and as an antisense RNA for UBE3A. *Hum. Mol. Genet.* *10*, 2687–2700.
