# Supplementary material for: Human Cerebral Organoids Reveal Early Spatiotemporal Dynamics and Pharmacological Responses of UBE3A
Source: PubMed Central journal article supplement — Stem Cell Reports. 2020 Sep 10;15(4):845–54. doi: 10.1016/j.stemcr.2020.08.006 (PMC7561513; doi:10.1016/j.stemcr.2020.08.006), 2020-09-10
Supplement: mmc2.pdf [file mmc2.pdf]

# Human Cerebral Organoids Reveal Early Spatiotemporal Dynamics and Pharmacological Responses of UBE3A

Dilara Sen,<sup>1</sup> Alexis Voulgaropoulos,<sup>1</sup> Zuzana Drobna,<sup>1,2</sup> and Albert J. Keung<sup>1,\*</sup>

<sup>1</sup>Department of Chemical and Biomolecular Engineering, North Carolina State University, Campus Box 7905, Raleigh, NC 27606, USA

<sup>2</sup>Department of Biological Sciences, North Carolina State University, Raleigh, NC 27695-7905, USA

\*Correspondence: [ajkeung@ncsu.edu](mailto:ajkeung@ncsu.edu)

<https://doi.org/10.1016/j.stemcr.2020.08.006>

## SUMMARY

Angelman syndrome is a complex neurodevelopmental disorder characterized by delayed development, intellectual disability, speech impairment, and ataxia. It results from the loss of UBE3A protein, an E3 ubiquitin ligase, in neurons of the brain. Despite the dynamic spatiotemporal expression of UBE3A observed in rodents and the potential clinical importance of when and where it is expressed, its expression pattern in humans remains unknown. This reflects a common challenge of studying human neurodevelopment: prenatal periods are hard to access experimentally. In this work, human cerebral organoids reveal a change from weak to strong UBE3A in neuronal nuclei within 3 weeks of culture. Angelman syndrome human induced pluripotent stem cell-derived organoids also exhibit early silencing of paternal *UBE3A*, with topoisomerase inhibitors partially rescuing UBE3A levels and calcium transient phenotypes. This work establishes human cerebral organoids as an important model for studying UBE3A and motivates their broader use in understanding complex neurodevelopmental disorders.

## INTRODUCTION

Angelman syndrome (AS) is characterized by delayed development, severe speech impairment, ataxia, and intellectual disability (Lopez et al., 2019). It results from mutations, deletions, or imprinting defects that negatively affect the levels or activities of UBE3A (Kishino et al., 1997), an E3 ubiquitin ligase (LaSalle et al., 2015). In neurotypical development, *UBE3A* is initially expressed biallelically and then becomes paternally silenced in neurons of the brain, which leaves the maternal allele the only source of UBE3A and the reason its specific maternal loss or mutation results in AS.

Rodent studies have revealed additional key molecular features of UBE3A important in disease etiology. These features share a common characteristic in that they occur at relatively early periods in neurodevelopment. For example, epigenetic silencing of paternal *Ube3a* and loss of UBE3A in AS mouse models was observed perinatally (Judson et al., 2014). Furthermore, early ablation or rescue of UBE3A in AS mouse models induced or rescued behavioral phenotypes, respectively (Silva-Santos et al., 2015; Sonzogni et al., 2019).

In addition to its imprinted expression, one of the salient molecular features of UBE3A is its nuclear localization in neurons, which also occurs perinatally and in the first couple postnatal weeks of murine neurodevelopment (Burette et al., 2017; Judson et al., 2014). This localization may be regulated by shifts in the expression levels of UBE3A isoforms (Sirois et al., 2020). It was recently shown that mice lacking a nuclear UBE3A isoform exhibited electrophysiological and behavioral deficits

similar to those in other AS model mice (Avagliano Trezza et al., 2019). Apart from its ubiquitin ligase activity, UBE3A also has a putative role in transcriptional regulation, implying that these two independent functions could be influenced by its localization and contribute to disease phenotypes (LaSalle et al., 2015).

This work motivates three important and interrelated questions. In which cell types are these molecular features occurring, when are they occurring, and how do these features map to human neurodevelopment, if they do at all? Studying early pre- and perinatal periods, even in animal models, is challenging given the restricted availability and experimental tractability of human fetal tissue. Furthermore, there are significant differences in mouse and human imprinting centers (Johnstone et al., 2006) and UBE3A isoforms (LaSalle et al., 2015). To address these challenges, human stem cell-derived neurons (Fink et al., 2017; Hsiao et al., 2019) and cerebral organoids (hCOs) (Sun et al., 2019) are promising experimental models for AS research. hCOs in particular provide access to early prenatal periods of human neurodevelopment in an experimentally tractable and abundant form, as they have been shown to accurately model the cell types and transcriptomes of early human neurodevelopment (Camp et al., 2015; Kanton et al., 2019; Quadrato et al., 2017).

In this work, hCOs reveal the complex spatiotemporal dynamics of UBE3A in a range of neurodevelopmental cell types, identify key prenatal developmental windows for the subcellular localization and imprinted expression of UBE3A, and capture transcriptional and functional responses to candidate small-molecule therapeutics.

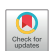

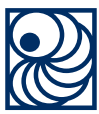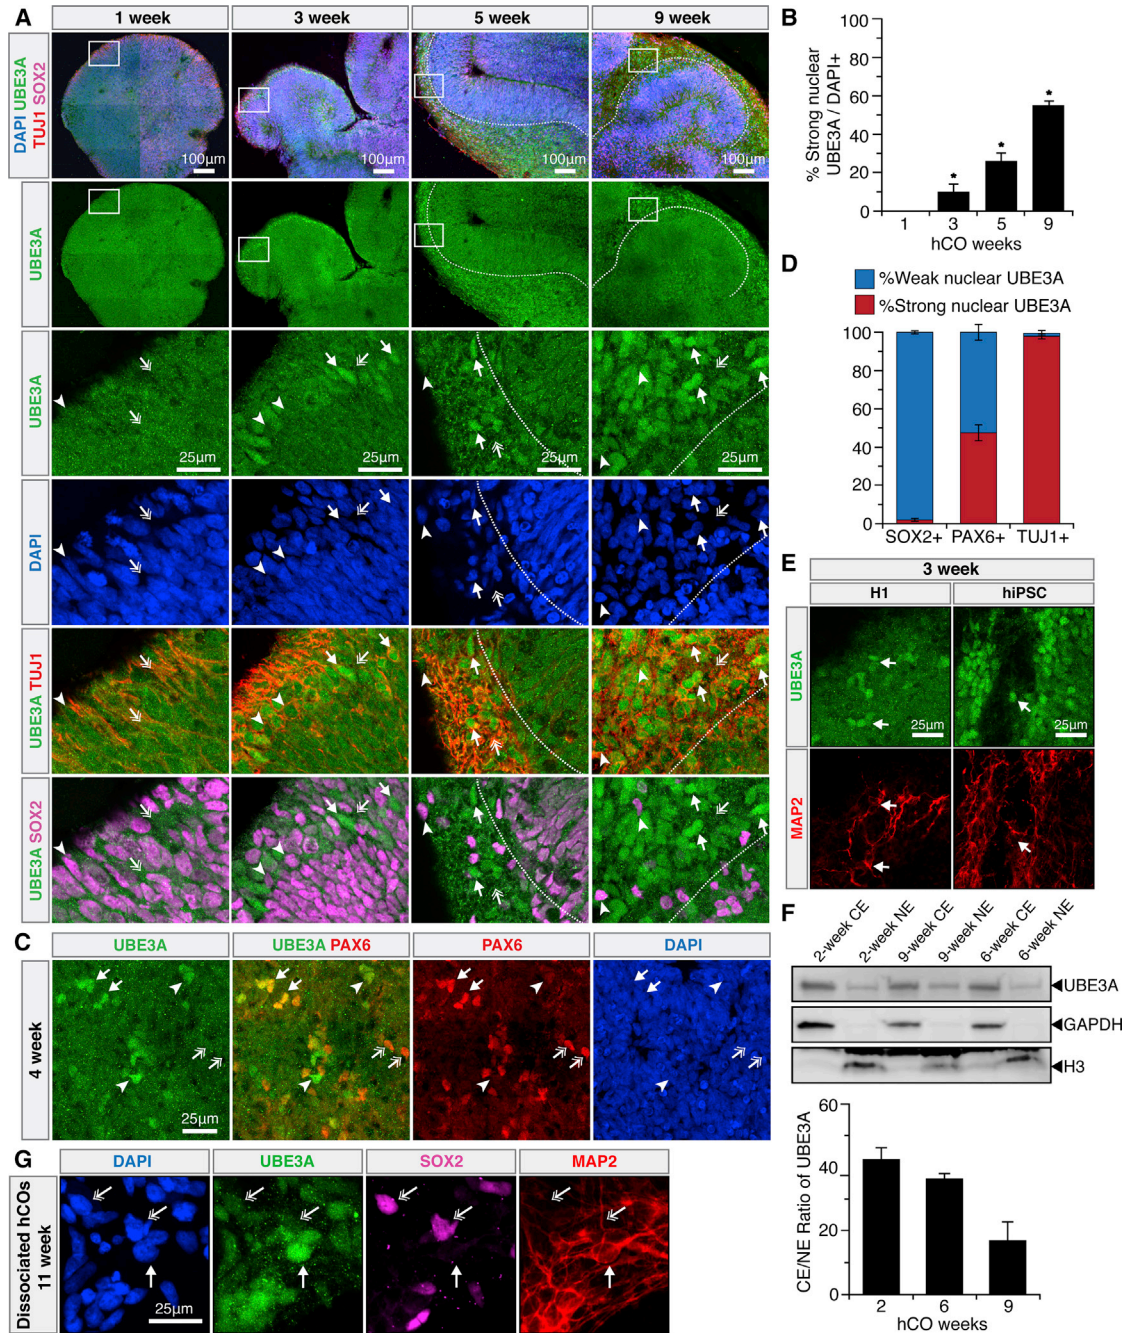

**Figure 1. hCOs Reveal an Early Change from Weak to Strong Nuclear UBE3A in Neurons**

(A) Immunostaining of neurotypical hCO neurodevelopment. Strong nuclear UBE3A in neurons (arrows) and weak nuclear UBE3A in SOX2<sup>+</sup> cells (arrowheads) are seen. Cytoplasmic UBE3A decreases over time (double arrows). Dotted white lines delineate boundaries between TUJ1<sup>+</sup> and SOX2<sup>+</sup> cells.

(B) Percentage of strong nuclear UBE3A increases during hCO development. Immunostaining quantification. \*p < 0.05 between all groups, one-way ANOVA with Tukey-Kramer post hoc analysis, n = 3 independent experiments with two organoids in each. Error bars, 95% confidence intervals.

(C) Strong (arrows) and weak (double arrows) nuclear UBE3A in PAX6<sup>+</sup> cells. Strong nuclear UBE3A in PAX6<sup>-</sup>/weak cells (arrowheads) is seen.

(legend continued on next page)

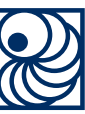

## RESULTS

### hCOs Reveal an Early Change from Weak to Strong Nuclear UBE3A in Neuronal Nuclei

In this work, “whole-brain” hCOs (Lancaster et al., 2013) were first used to efficiently map when and in which cell types *UBE3A* was expressed. Neurotypical hCOs derived from H9 human embryonic stem cells (hESCs) were fixed over a broad time range (1–12 weeks to approximate the first trimester) and stained for nuclei, UBE3A, and a panel of cell-type-specific markers (Figures 1, 2, S1, and S3). Interestingly, UBE3A was prominently nuclear in a substantial number of neurons after only 3 weeks in culture, and this localization increased over time (Figures 1A, 1B, and S1A). This matched the transition observed in P0-P7 mice on an absolute timescale (Judson et al., 2014). Neuronal differentiation tracked the change in UBE3A localization: TUJ1<sup>+</sup> neuronal areas showed much stronger nuclear UBE3A staining compared with SOX2<sup>+</sup> stem cells, and roughly half of PAX6<sup>+</sup> progenitors exhibited strong nuclear UBE3A (Figures 1A, 1C, 1D, and S1A–S1C), with similar results observed in two additional pluripotent cell lines (Figure 1E). Supporting these immunostaining patterns, the ratio of cytoplasmic to nuclear UBE3A measured through subcellular fractionation and western blot decreased over the course of 2, 6, and 9 weeks in H9 hCOs (Figure 1F). While subcellular fractionation results cannot be used to definitively conclude an increase in nuclear UBE3A in neurons given the heterogeneous cell type composition of hCOs, immunostaining results from 3D sectioned (Figures 1A and 1D) and 2D dissociated hCOs (Figures 1G and S2D) also showed no evidence of increased nuclear UBE3A in progenitors.

### Strong UBE3A Signal in Neuronal Nuclei Correlates to Early Stages of Prenatal Neurodevelopment

In addition to absolute timescales, the presence of specific cell types in hCOs can be correlated to distinct stages of fetal neurodevelopment. The fetal cortex comprises cell layers representing different stages of differentiation, including a sequential transition from neural precursors (SOX2), to radial glia and intermediate progenitors (EOMES), to postmitotic neurons (TBR1, CTIP2, SATB2)

(Figure 2A) (Englund et al., 2005). Interestingly, a striking boundary formed between layers of TBR1<sup>+</sup> and EOMES<sup>+</sup> cells, with strong nuclear UBE3A only in TBR1<sup>+</sup> cells (Figures 2B and 2C). CTIP2<sup>+</sup> (precursors of early-born deep-layer neurons) and SATB2<sup>+</sup> (precursors of late-born superficial-layer neurons) cells also expressed strong nuclear UBE3A (Figures 2B, 2D, 2E, and S3A–S3C). Furthermore, mature SATB2<sup>+</sup>/TBR1<sup>-</sup> cells (late-born superficial-layer neurons) exhibited a relative loss in nuclear UBE3A compared with their more immature SATB2<sup>+</sup>/TBR1<sup>+</sup> counterparts (Figures 2B, 2E, 2F, and S3B), consistent with observations in P0-P7 mice (Judson et al., 2014). Interestingly, strong coexpression of TBR1 with SATB2 and CTIP2 correlates with periods before human postconception week 20 (PCW20), with separation of these markers occurring closer to PCW30 in human fetal tissue (Saito et al., 2011); this suggests these tissue-like structures in hCOs may reflect PCW20–30 and that UBE3A is already stronger in the neuronal nuclei at this stage of neurodevelopment.

It was previously reported that Calretinin in the early fetal brain is specifically coexpressed with TBR1 only in the first excitatory projection neurons of the cortex during human PCW7–7.5 and diminishes shortly after PCW8 (Gonzalez-Gomez and Meyer, 2014). Both Calretinin<sup>+</sup>/TBR1<sup>+</sup> and Calretinin<sup>-</sup>/TBR1<sup>+</sup> neurons appeared in hCOs, and in both cell types in hCOs UBE3A was localized primarily to the nucleus, but the expression of UBE3A was higher in Calretinin<sup>+</sup> neurons (Figures 2G and S3D). Collectively these results indicate that the nuclear localization of UBE3A in hCOs correlates with at least the mid-to-late first trimester of human gestation.

### UBE3A Is Imprinted and Aberrantly Localized in Angelman Syndrome hCOs

In addition to its subcellular localization, the dosage of UBE3A, controlled by the epigenetic silencing of its paternal allele in neurons, is a primary driver of AS. However, it is not known when paternal *UBE3A* silencing occurs during human neurodevelopment. *UBE3A-ATS* is a long non-coding RNA whose paternal expression is known to increase during development and to silence paternal *UBE3A* (Hsiao et al., 2019; Stanurova et al., 2016) (Figure 3A). To track the timing of imprinting in hCOs, *UBE3A* and *UBE3A-ATS* transcripts were measured by

(D) UBE3A localization by cell type identified by immunostaining. Error bars, 95% confidence intervals. n = 3 independent experiments with two organoids in each.

(E) H1- and hiPSC-derived hCOs. Strong nuclear UBE3A in neurons (arrows) is seen.

(F) Immunoblot analysis of UBEA, GAPDH, and H3 using nuclear (NE) and cytoplasmic (CE) extracts isolated from H9 hCOs. n = 2 independent experiments with 15–25 organoids in each. Error bars, 95% confidence intervals.

(G) 2D immunostaining of dissociated H9 hCOs. Strong nuclear UBE3A in neurons (arrows) and weaker diffuse staining in progenitors (double arrows) are seen.

(See also Figures S1 and S2)

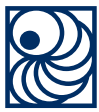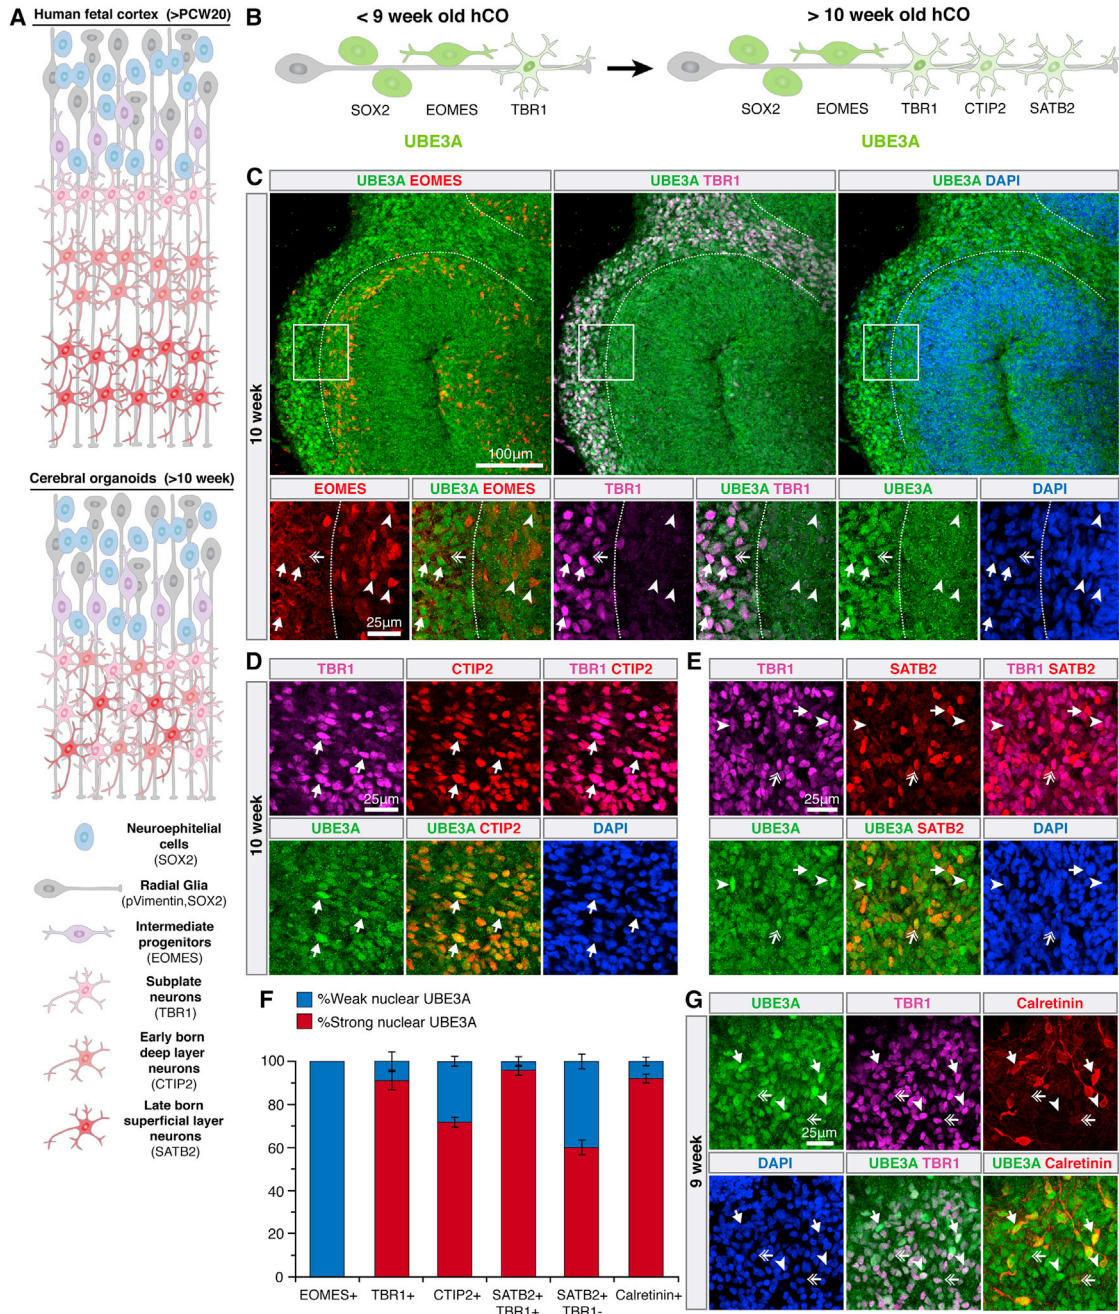

**Figure 2. Strong UBE3A Signal in Neuronal Nuclei in hCOs Correlates to Early Stages of Prenatal Neurodevelopment**

(A) Schematics illustrating the simplified cellular and laminar organization of the developing human fetal cortex and that of a typical hCO. (B) Summary of dynamic UBE3A localization in neurotypical hCOs. (C) Dotted white lines delineate boundaries between TBR1<sup>+</sup> and EOMES<sup>+</sup> regions. Strong nuclear UBE3A in TBR1<sup>+</sup> cells (arrows), weak nuclear UBE3A in EOMES<sup>+</sup> cells (arrowheads), and weak UBE3A in cytoplasm of TBR1<sup>+</sup> cells (double arrows) are seen. (D) Strong nuclear UBE3A colocalizes with CTIP2<sup>+</sup>/TBR1<sup>+</sup> cells (arrows). (E) Strong nuclear UBE3A in TBR1<sup>+</sup>/SATB2<sup>-</sup> (arrowheads) and TBR1<sup>-</sup>/SATB2<sup>+</sup> (double arrows) cells and weaker UBE3A in TBR1<sup>-</sup>/SATB2<sup>+</sup> cells (arrows). (F) UBE3A localization by cortical cell type identified by immunostaining. Error bars, 95% confidence intervals. n = 3 independent experiments with two organoids in each. (G) UBE3A localization in 9-week hCOs.

(legend continued on next page)



RT-qPCR (Figures 3B and 3C). hCOs were generated from H9 cells as well as AS human induced pluripotent stem cells (hiPSCs) that harbor a large maternal *UBE3A* deletion, previously generated and characterized by Chamberlain and colleagues (Chamberlain et al., 2010). Direct comparisons between these cell lines remained phenomenological in this study as they are not isogenic; however, AS hCOs provided a method to unambiguously determine when paternal *UBE3A* is silenced, as maternal *UBE3A* is absent. Both hCOs exhibited a monotonic increase in *UBE3A-ATS* transcripts starting at 3 weeks in culture (Figure 3B). *UBE3A* transcripts decreased in AS hCOs, but only after 6 weeks (Figure 3C). This ~3 week delay is similar to previous observations in hiPSC-derived neurons (Hsiao et al., 2019; Stanurova et al., 2016).

The subcellular localization of paternal *UBE3A* in AS hCOs was also tracked over time (Figures 3D–3H and S4A–S4E). Interestingly, unlike in neurotypical hCOs, a salient nuclear *UBE3A* localization pattern was observed in *SOX2*<sup>+</sup> and *EOMES*<sup>+</sup> progenitors during early hCO development (4–7 weeks) (Figures 3D–3F and S4A). In older AS hCOs (10–12 weeks), *UBE3A* expression became substantially more diffuse in *EOMES*<sup>+</sup> cells (Figures 3E, 3F, 3H, and S4B). Similarly, in neurons of 3–7 week hCOs, *UBE3A* was prominently nuclear, but upon extended culture (10–17 weeks) *UBE3A* intensity weakened, indicating that the paternal allele was silenced during this time interval (Figures 3D, 3F–3H, S4A, S4C, and S4D). Interestingly, immature *SOX2*<sup>+</sup>/*TUJ1*<sup>+</sup> neurons did exhibit nuclear *UBE3A* in 10–12 week AS hCOs (Figure S4E), consistent with previous reports of paternal *UBE3A* expression in immature neurons (Judson et al., 2014).

### Topoisomerase Inhibitors Partially Rescue *UBE3A* Levels and Neuronal Function in AS hCOs

Since AS hCOs successfully silence paternal *UBE3A*, they represent a potentially useful system to study therapeutic strategies. Prior work found that topoisomerase inhibitors (topotecan and indotecan) could suppress *UBE3A-ATS* and reactivate paternal *UBE3A* in mice and in human cell cultures (Fink et al., 2017; Huang et al., 2012; Lee et al., 2018) to compensate for the absent maternal copy. To assess their activity in hCOs, 1  $\mu$ M topotecan or indotecan was added to hCOs at different ages and dosing regimens. These drugs were added to 11 week hCOs, as significant silencing of *UBE3A* was observed at that time point (Figures 3C, 3D, and 3H). *UBE3A-ATS* and *UBE3A* transcripts were measured 3 days after treatment. Both topotecan and indotecan were able to knock down *UBE3A-ATS* 7- and 4-fold

and increased *UBE3A* 1.8- and 1.75-fold, respectively (Figure 4A). Importantly, nuclear *UBE3A* in individual neurons identified with a CamKIIa-GFP reporter increased with treatment as well (Figures 4B and 4C). Interestingly, in addition to neurons, *SOX2*<sup>+</sup> neural precursor cells also showed increased *UBE3A* levels (Figure S4G), suggesting the effect of topoisomerase inhibition may affect other cell types, and that there may be further room for *UBE3A* levels to increase even when already actively transcribed at basal levels. Indeed, *UBE3A* levels also increased in neurotypical hCOs treated with topotecan (Figure S4G).

A crucial set of questions in the treatment of neurodevelopmental disorders is at what time point, how frequently, and for how long should potential therapeutics be delivered; furthermore, how persistent are therapeutic effects? To address these questions, topoisomerase inhibitors were delivered to AS hCOs at 4, 11, or 15 weeks followed by qRT-PCR 3 days after treatment. Both inhibitors knocked down *UBE3A-ATS* and increased *UBE3A* at 11 and 15 weeks (Figures 4A and S4H). However, at 4 weeks, only *UBE3A-ATS* decreased (Figure 4D), likely attributable to the fact that *UBE3A* transcripts were still high at that early time point (Figure 3B).

Next, 1  $\mu$ M indotecan was added to AS hCOs every day for 9 days and analyzed at days 1, 3, 6, and 9. This experiment asked if the rescue of *UBE3A* could be enhanced by persistent and longer-term indotecan delivery. *UBE3A* transcripts increased up to day 6 but decreased on day 9. *UBE3A-ATS* transcripts remained low throughout this analysis with no significant differences between time points (Figures 4E and S4I).

The decrease in *UBE3A* transcripts after 9 days of repeated treatments may have been due to the toxicity of topoisomerase inhibitors (Lee et al., 2018). It would therefore be advantageous if fewer doses could still elicit a persistent response. To test this, 11 week AS hCOs were exposed to a single treatment of topotecan or indotecan, changing to fresh medium without inhibitor after 3 days, and measuring transcript levels 10 and 17 days later. While topotecan was unable to elevate *UBE3A* levels, indotecan persistently rescued *UBE3A* (Figures 4F and 4G). The increased “memory” of indotecan response could be due to the compound’s increased chemical stability or an as yet unknown epigenetic mechanism.

In addition to paternal *UBE3A* activation, indotecan was also able to partially rescue calcium transient phenotypes in AS hCOs. AS hCOs exhibited shorter interevent intervals and higher calcium transient frequencies compared with neurotypical hCOs, in agreement with recent work (Sun

(G) Strong nuclear *UBE3A* in *TBR1*<sup>+</sup>/*Calretinin*<sup>+</sup> (arrows), *TBR1*<sup>+</sup>/*Calretinin* weak (double arrows), and *TBR*<sup>+</sup>/*Calretinin*<sup>−</sup> (arrowheads) neurons.

(See also Figure S3.)

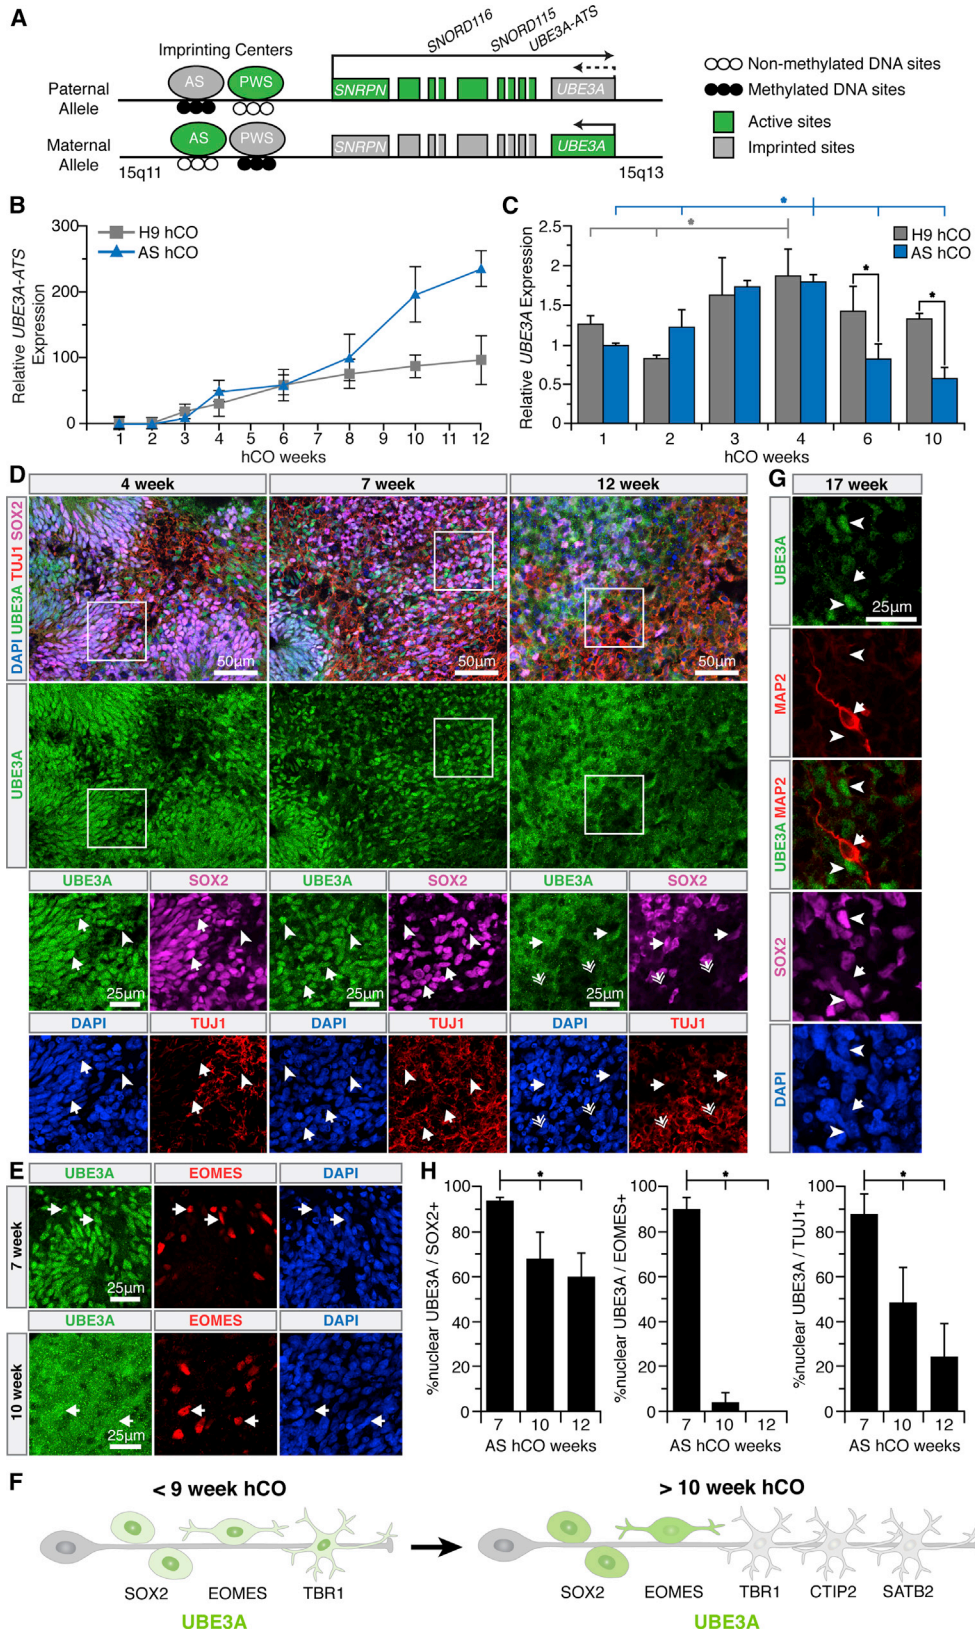

(legend on next page)



et al., 2019). Fourteen days post treatment by indotecan, transient amplitudes were rescued to levels nearing that of neurons from neurotypical hCOs (Figures 4H–4J).

## DISCUSSION

The excitement surrounding hCOs derives from their potential to fill important gaps, in this case in prenatal human development, that are difficult to access by other experimental systems. One of the most important aspects of *UBE3A* biology is the fact that the salient changes both in subcellular localization and in *UBE3A-ATS/UBE3A* expression occurred in what is the hCO equivalent of the first human trimester. The potential implications of these early dynamics are profound. Although hCOs cannot capture behavioral phenotypes, recent work through conditional *UBE3A* knockout or reinstatement shows that at least a subset of behaviors in mice are affected by perinatal *UBE3A* levels and cannot be rescued later in neurodevelopment (Rotaru et al., 2018; Silva-Santos et al., 2015; Sonzogni et al., 2019). Collectively, both hCO and mouse studies support a scenario in which early, even prenatal, treatment in humans may be necessary to have maximal therapeutic effects, although significant benefits may still be achieved through interventions later in life.

Another major advantage of using hCOs is their ability to generate a diverse range of human cell types from very early points in neurodevelopment that may be important in disease etiology. In our experiments we observed aberrant nuclear *UBE3A* in neural precursor cells of early AS hCOs (Figures 3D and 3E, 3H, S4A, S4B). Intriguingly there is some evidence of impacts on neurogenesis implicated in autism spectrum disorder, which shares some comorbidities with AS. Furthermore, prior work has reported partial paternal imprinting in progenitor cell types (Herzing et al., 2002). However, while nuclear expression of *UBE3A* is a hallmark of neuronal differentiation, and it is critical for proper function, the precise mechanistic role of nuclear *UBE3A* is not

well understood even in neurons. Thus, although the clinical significance of this aberrant localization is unclear, it may hint at a potential role for neurogenesis in AS etiology. Additional work in this area is needed to identify not only the subcellular localization of *UBE3A* in distinct cell types, but also the absolute and graded levels of cytoplasmic and nuclear *UBE3A* and the levels of each *UBE3A* isoform in different cell types with improved temporal resolution. Overall, this work motivates the broader use of hCOs in future work to unlock important and highly relevant prenatal time periods in investigating imprinted genes, complex epigenetic phenomena, and their related neurodevelopmental disorders.

## EXPERIMENTAL PROCEDURES

### Cell Culture and Cerebral Organoid Generation

Feeder-independent cell lines were H9 and H1 hESCs (WA09 and WA01, WiCell) and hiPSCs (cat. no. SC102-A1, Systems Biosciences). AS hiPSCs were developed in the Chamberlain and Lalande groups and obtained from Kerastat (Chamberlain et al., 2010). *UBE3A* double-knockout H9 cells (H9<sup>UBE3A m-/p-</sup>) with a 66 kb deletion (chr15: 25,338,949–25,405,676) were provided by Dr. Stormy Chamberlain (UCONN) (Sirois et al., 2020). Cells were maintained in tissue culture dishes (Fisher Scientific Corning Costar) coated with 0.5 mg/cm<sup>2</sup> vitronectin (VTN-N; Thermo Fisher Scientific) in E8 medium (Thermo Fisher Scientific) and passaged using standard protocols. The imprinting status of H9, H1, and AG1-0 cell lines was confirmed previously (Chamberlain et al., 2010; Stanurova et al., 2016). hCOs were generated and maintained using the same protocol as described at 37°C with 5% CO<sub>2</sub> (Lancaster et al., 2013).

### Immunofluorescence, Immunoblot, and qRT-PCR Analyses

Standard methods were used. Detailed protocols are provided in the Supplemental Information.

### Topotecan and Indotecan Treatment

Topotecan (Sigma Aldrich) and indotecan (NCI) were directly added to AS hCOs at 1 μM final concentration in culture

## Figure 3. *UBE3A* Is Imprinted and Aberrantly Localized in Angelman Syndrome hCOs

(A) The *UBE3A* locus.

(B and C) qRT-PCR measurements of mRNA levels of *UBE3A-ATS* (B) and *UBE3A* (C) in neurotypical and AS hCOs, normalized to HPRT, ratioed to 1 week AS hCOs. Error bars are 95% confidence intervals. (B)  $p < 0.05$  t test against null-slope hypothesis.  $n = 3$  independent experiments with three to five organoids in each. (C)  $*p < 0.05$ , full tick marks compared with half tick marks by one-way ANOVA with Tukey-Kramer post hoc.  $n = 3$  independent experiments with three to five organoids in each.

(D, E, and G) *UBE3A* expression and localization in AS hCOs. (D) Salient nuclear *UBE3A* in SOX2<sup>+</sup> progenitors of 4–12 week AS hCOs (arrows). Salient nuclear *UBE3A* in 4–7 week TUJ1<sup>+</sup>/SOX2<sup>-</sup> neurons (arrowheads) is lost in 12 week AS hCOs (double arrows).

(E) Strong nuclear *UBE3A* in 7 week EOMES<sup>+</sup> cells (arrows) is weakened at 10 weeks in AS hCOs.

(F) Summary of dynamic *UBE3A* localization in AS hCOs.

(G) *UBE3A* is absent in 17 week MAP2<sup>+</sup>/SOX2<sup>-</sup> neurons (arrows). SOX2<sup>+</sup> progenitors still express some paternal *UBE3A* (arrowheads).

(H) Percentage of nuclear *UBE3A* in 7–12 week AS hCOs.  $*p < 0.05$ , full tick marks compared with half tick marks by one-way ANOVA with Tukey-Kramer post hoc analysis,  $n = 3$  independent experiments with two organoids in each. Error bars are 95% confidence intervals.

(See also Figure S4.)

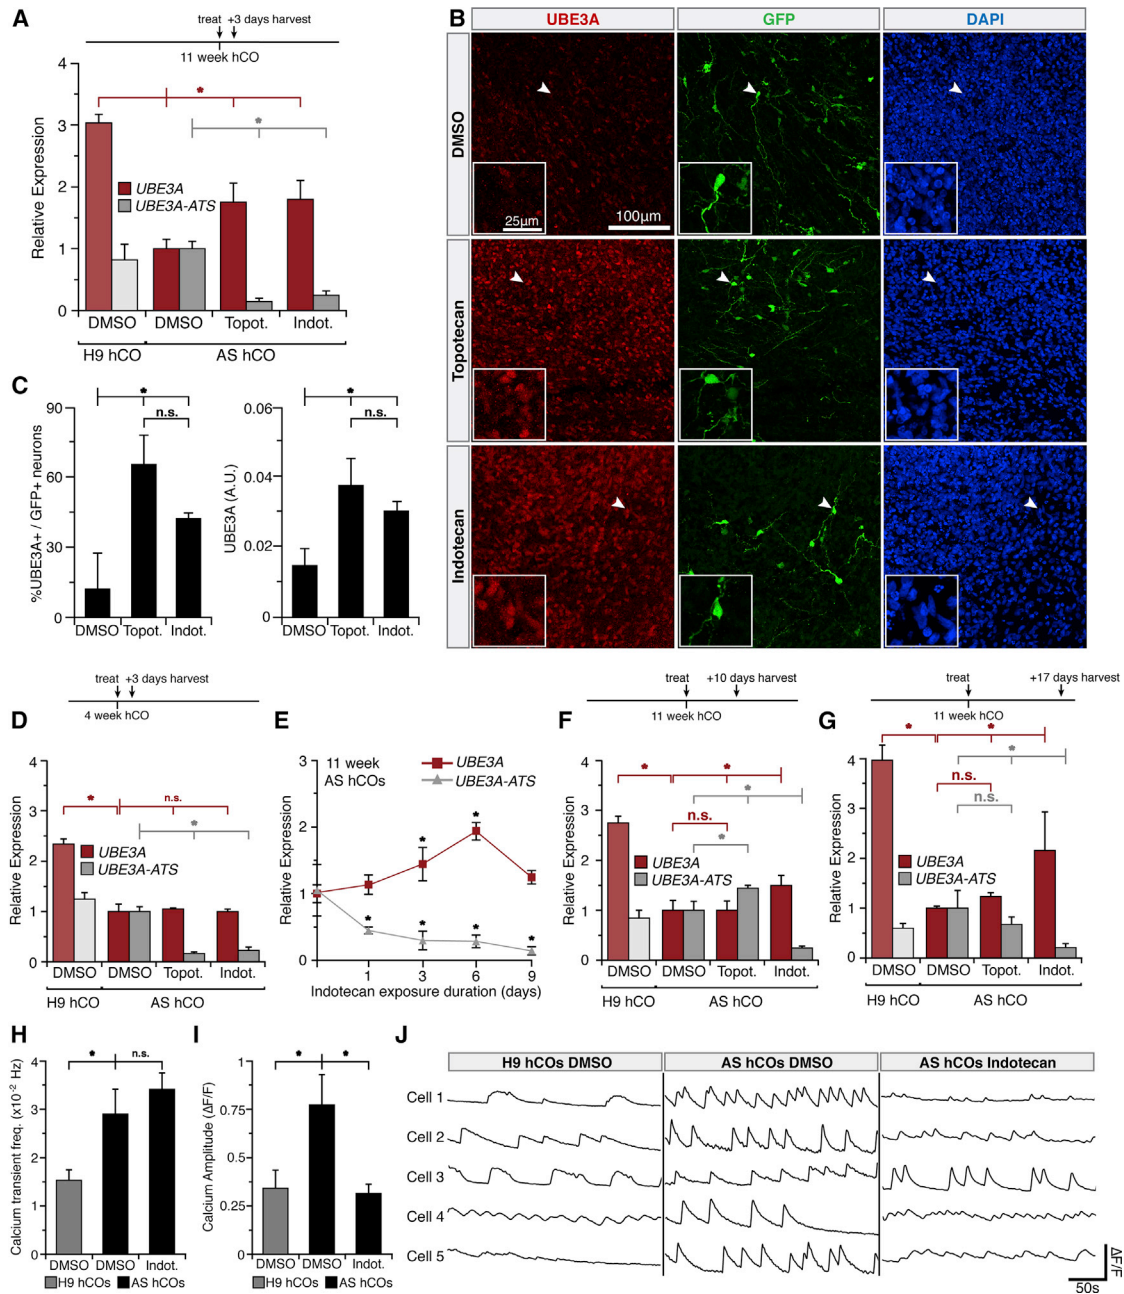

**Figure 4. Topoisomerase Inhibitors Partially Rescue *UBE3A* Levels and Neuronal Function in AS hCOs**

(A, D, F, and G) qRT-PCR measurements of mRNA levels of *UBE3A* (red) and *UBE3A-ATS* (gray) after vehicle (DMSO), 1  $\mu$ M topotecan, or 1  $\mu$ M indotecan treatment. Signals normalized to TATA-box binding protein (TBP) and ratioed to vehicle-treated AS hCOs.

(A) mRNA 3 days after a single drug treatment in 11 week hCOs.

(B) 11 week AS hCOs with CamKIIa-GFP neurons. Insets zoom in on arrowheads.

(C) Quantification of (B).

(D) mRNA 3 days after a single drug treatment in 4 week hCOs.

(E) mRNA after 1–9 days of continuous 1  $\mu$ M indotecan treatment in 11 week AS hCOs, ratioed to untreated day 0 AS hCOs. No significant change in vehicle-treated samples (Figure S4C).

(F) mRNA 10 days after a single drug treatment in 11 week hCOs.

(G) mRNA 17 days after a single drug treatment in 11 week hCOs. Statistics: \* $p < 0.05$ , n.s., not significant, full tick marks compared with half tick marks by one-way ANOVA with Tukey-Kramer post hoc. For (A, D, E, F, G)  $n = 3$  independent experiments with three to five

(legend continued on next page)





medium. hCOs were cultured for 72 h without a fresh medium change. For long-term effects of single-drug exposure experiments, the first drug-free medium change was performed 3 days after the single-drug administration. Samples were collected 7 and 14 days after the fresh medium change (total of 10 and 17 days from initial drug exposure). When testing the effects of drug exposure time, hCO culture medium was replaced daily with fresh medium containing drugs. For live imaging experiments, hCO cells were treated with 1  $\mu$ M indotecan or vehicle and cultured for 72 h without a fresh medium change. Live  $\text{Ca}^{2+}$  imaging was carried out 2 weeks after the 72 h treatment.

### Live $\text{Ca}^{2+}$ Imaging

Live imaging was performed using a Nikon AR confocal laser-scanning microscope (Nikon) equipped with temperature and  $\text{CO}_2$  control. For calcium imaging, Fluo-4 direct (Life Technologies) was prepared according to the manufacturer's protocol. hCOs were dissociated using Accutase (STEMCELL Technologies) and plated on reduced growth factor Matrigel (Corning) for 2–3 weeks before experiments were conducted. hCO cells were incubated with Fluo-4 60 min prior to start of imaging. Frames were taken every 2 s for 150 frames. Data analysis of calcium imaging was performed using FIJI. Regions of interest were manually selected, and mean fluorescence was calculated for each time frame. Change in fluorescence was calculated as follows:  $\Delta F/F = (F - F_0)/F_0$ , in which  $F_0$  was the mean fluorescence value recorded at  $t = 0$ .

### Data Availability and Code Availability

The datasets generated and/or analyzed during the current study are available from the corresponding author on reasonable request.

No custom codes or mathematical algorithms were used in this work.

### SUPPLEMENTAL INFORMATION

Supplemental Information can be found online at <https://doi.org/10.1016/j.stemcr.2020.08.006>.

### AUTHOR CONTRIBUTIONS

D.S. and A.J.K. conceived the study. D.S. planned and performed the wet lab experiments with guidance from A.J.K. and experimental support from A.V. and Z.D. D.S. and A.J.K. wrote the paper.

organoids in each; error bars, 95% confidence intervals. For (C) A.U., arbitrary fluorescence units;  $n = 3$  independent experiments with two organoids in each.

(H–J) (H) Quantification of the calcium transient frequencies. (I) Quantification of the amplitudes of calcium transients. (J) Representative sets of calcium transient traces extracted from individual neurons of H9 DMSO, AS DMSO, and AS indotecan-treated hCOs.

Statistics for (H and I): \* $p < 0.05$ , two-tailed unpaired Student's  $t$  test.  $n = 22$ , 41, and 34 neurons from H9 DMSO, AS DMSO, and AS indotecan-treated hCOs, respectively. Note: statistical comparison between H9 and AS hCOs shown only for completeness, as these are non-isogenic cell lines.

(See also [Figure S4](#).)

### ACKNOWLEDGMENTS

This work was supported by a Simons Foundation SFARI Explorers grant (495112), a Faculty Research and Professional Development Program and Research Innovation Seed Fund Grant from NCSU, the NSF Emerging Frontiers in Research and Innovation program (NSF-1830910), an NIH Avenir Award (DP1-DA044359), and a fellowship from the American Association of University Women (to D.S.). The Developmental Therapeutics Program branch, National Cancer Institute, provided indotecan (LMP400). We thank Drs. Stormy Chamberlain (University of Connecticut Genetics and Genome Sciences, Farmington, CT) and Benjamin Philpot (University of North Carolina School of Medicine, Chapel Hill, NC) for graciously gifting the *UBE3A* double-knockout H9 hESC line and wild-type and AS mouse brain sections, respectively. We thank Drs. Mark Zylka and G. Aneeshkumar Arimbasseri for their helpful discussions.

Received: December 6, 2019

Revised: August 11, 2020

Accepted: August 12, 2020

Published: September 10, 2020

### REFERENCES

- Avagliano Trezza, R., Sonzogni, M., Bossuyt, S.N.V., Zampeta, F.I., Punt, A.M., van den Berg, M., Rotaru, D.C., Koene, L.M.C., Munshi, S.T., Stedehouder, J., et al. (2019). Loss of nuclear *UBE3A* causes electrophysiological and behavioral deficits in mice and is associated with Angelman syndrome. *Nat. Neurosci.* 22, 1235–1247.
- Burette, A.C., Judson, M.C., Burette, S., Phend, K.D., Philpot, B.D., and Weinberg, R.J. (2017). Subcellular organization of *UBE3A* in neurons. *J. Comp. Neurol.* 525, 233–251.
- Camp, J.G., Badsha, F., Florio, M., Kanton, S., Gerber, T., Wilsch-Bräuning, M., Lewitus, E., Sykes, A., Hevers, W., Lancaster, M., et al. (2015). Human cerebral organoids recapitulate gene expression programs of fetal neocortex development. *Proc. Natl. Acad. Sci. U S A* 112, 15672–15677.
- Chamberlain, S.J., Chen, P.-F., Ng, K.Y., Bourgois-Rocha, F., Lemtiri-Chlieh, F., Levine, E.S., and Lalande, M. (2010). Induced pluripotent stem cell models of the genomic imprinting disorders Angelman and Prader-Willi syndromes. *Proc. Natl. Acad. Sci. U S A* 107, 17668–17673.
- Englund, C., Fink, A., Lau, C., Pham, D., Daza, R., Bulfone, A., Kowalczyk, T., and Hevner, R. (2005). *Pax6*, *Tbr2*, and *Tbr1* are expressed sequentially by radial glia, intermediate progenitor cells,



- and postmitotic neurons in developing neocortex. *J. Neurosci.* **25**, 247–251.
- Fink, J.J., Robinson, T.M., Germain, N.D., Sirois, C.L., Bolduc, K.A., Ward, A.J., Rigo, F., Chamberlain, S.J., and Levine, E.S. (2017). Disrupted neuronal maturation in Angelman syndrome-derived induced pluripotent stem cells. *Nat. Commun.* **8**, 15038.
- Gonzalez-Gomez, M., and Meyer, G. (2014). Dynamic expression of calretinin in embryonic and early fetal human cortex. *Front. Neuroanat.* **8**, 41.
- Herzing, L.B.K., Cook, E.H., and Ledbetter, D.H. (2002). Allele-specific expression analysis by RNA-FISH demonstrates preferential maternal expression of UBE3A and imprint maintenance within 15q11-q13 duplications. *Hum. Mol. Genet.* **11**, 1707–1718.
- Hsiao, J.S., Germain, N.D., Wilderman, A., Stoddard, C., Wojenski, L.A., Villafano, G.J., Core, L., Cotney, J., and Chamberlain, S.J. (2019). A bipartite boundary element restricts UBE3A imprinting to mature neurons. *Proc. Natl. Acad. Sci. U S A* **116**, 2181–2186.
- Huang, H.S., Allen, J.A., Mabb, A.M., King, I.F., Miriyala, J., Taylor-Blake, B., Sciaky, N., Dutton, J.W., Lee, H.M., Chen, X., et al. (2012). Topoisomerase inhibitors unsilence the dormant allele of Ube3a in neurons. *Nature* **481**, 185–191.
- Johnstone, K.A., DuBose, A.J., Futtner, C.R., Elmore, M.D., Brannan, C.I., and Resnick, J.L. (2006). A human imprinting centre demonstrates conserved acquisition but diverged maintenance of imprinting in a mouse model for Angelman syndrome imprinting defects. *Hum. Mol. Genet.* **15**, 393–404.
- Judson, M.C., Sosa-Pagan, J.O., Del Cid, W.A., Han, J.E., and Philpot, B.D. (2014). Allelic specificity of Ube3a expression in the mouse brain during postnatal Development. *J. Comp. Neurol.* **522**, 1874–1896.
- Kanton, S., Boyle, M.J., He, Z., Santel, M., Weigert, A., Sanchís-Calleja, F., Guijarro, P., Sidow, L., Fleck, J.S., Han, D., et al. (2019). Organoid single-cell genomic atlas uncovers human-specific features of brain development. *Nature* **574**, 418–422.
- Kishino, T., Lalonde, M., and Wagstaff, J. (1997). UBE3A/E6-AP mutations cause Angelman syndrome. *Nat. Genet.* **15**, 70–73.
- Lancaster, M.A., Renner, M., Martin, C.-A., Wenzel, D., Bicknell, L.S., Hurles, M.E., Homfray, T., Penninger, J.M., Jackson, A.P., and Knoblich, J.A. (2013). Cerebral organoids model human brain development and microcephaly. *Nature* **501**, 373–379.
- LaSalle, J.M., Reiter, L.T., and Chamberlain, S.J. (2015). Epigenetic regulation of UBE3A and roles in human neurodevelopmental disorders. *Epigenomics* **7**, 1213–1228.
- Lee, H.M., Clark, E.P., Kuijjer, M.B., Cushman, M., Pommier, Y., and Philpot, B.D. (2018). Characterization and structure-activity relationships of indenoisoquinoline-derived topoisomerase I inhibitors in unsilencing the dormant Ube3a gene associated with Angelman syndrome. *Mol. Autism* **9**, 45.
- Lopez, S.J., Segal, D.J., and LaSalle, J.M. (2019). UBE3A: an E3 ubiquitin ligase with genome-wide impact in neurodevelopmental disease. *Front. Mol. Neurosci.* **11**, 476.
- Quadrato, G., Nguyen, T., Macosko, E.Z., Sherwood, J.L., Min Yang, S., Berger, D.R., Maria, N., Scholvin, J., Goldman, M., Kinney, J.P., et al. (2017). Cell diversity and network dynamics in photosensitive human brain organoids. *Nature* **545**, 48–53.
- Rotaru, D.C., van Woerden, G.M., Wallaard, I., and Elgersma, Y. (2018). Adult Ube3a gene reinstatement restores the electrophysiological deficits of prefrontal cortex layer 5 neurons in a mouse model of Angelman syndrome. *J. Neurosci.* **38**, 8011–8030.
- Saito, T., Hanai, S., Takashima, S., Nakagawa, E., Okazaki, S., Inoue, T., Miyata, R., Hoshino, K., Akashi, T., Sasaki, M., et al. (2011). Neocortical layer formation of human developing brains and lissencephalies: consideration of layer-specific marker expression. *Cereb. Cortex* **21**, 588–596.
- Silva-Santos, S., van Woerden, G.M., Bruinsma, C.F., Mientjes, E., Jolfaei, M.A., Distel, B., Kushner, S.A., and Elgersma, Y. (2015). Ube3a reinstatement identifies distinct developmental windows in a murine Angelman syndrome model. *J. Clin. Invest.* **125**, 2069–2076.
- Sirois, C.L., Bloom, J.E., Fink, J.J., Gorka, D., Keller, S., Germain, N.D., Levine, E.S., and Chamberlain, S.J. (2020). Abundance and localization of human UBE3A protein isoforms. *Hum. Mol. Genet.* <https://doi.org/10.1093/hmg/ddaa191>.
- Sonzogni, M., Hakonen, J., Bernabé Kleijn, M., Silva-Santos, S., Judson, M.C., Philpot, B.D., van Woerden, G.M., and Elgersma, Y. (2019). Delayed loss of UBE3A reduces the expression of Angelman syndrome-associated phenotypes. *Mol. Autism* **10**, 23.
- Stanurova, J., Neureiter, A., Hiber, M., De Oliveira Kessler, H., Stolp, K., Goetzke, R., Klein, D., Bankfalvi, A., Klump, H., and Steenpass, L. (2016). Angelman syndrome-derived neurons display late onset of paternal UBE3A silencing. *Sci. Rep.* **6**, 30792.
- Sun, A.X., Yuan, Q., Fukuda, M., Yu, W., Yan, H., Lim, G.G.Y., Nai, M.H., D'Agostino, G.A., Tran, H.D., Itahana, Y., et al. (2019). Potassium channel dysfunction in human neuronal models of Angelman syndrome. *Science* **366**, 1486–1492.

**Stem Cell Reports, Volume 15**

**Supplemental Information**

**Human Cerebral Organoids Reveal Early Spatiotemporal Dynamics and  
Pharmacological Responses of UBE3A**

**Dilara Sen, Alexis Voulgaropoulos, Zuzana Drobna, and Albert J. Keung**

**SUPPLEMENTAL FIGURES AND LEGENDS**

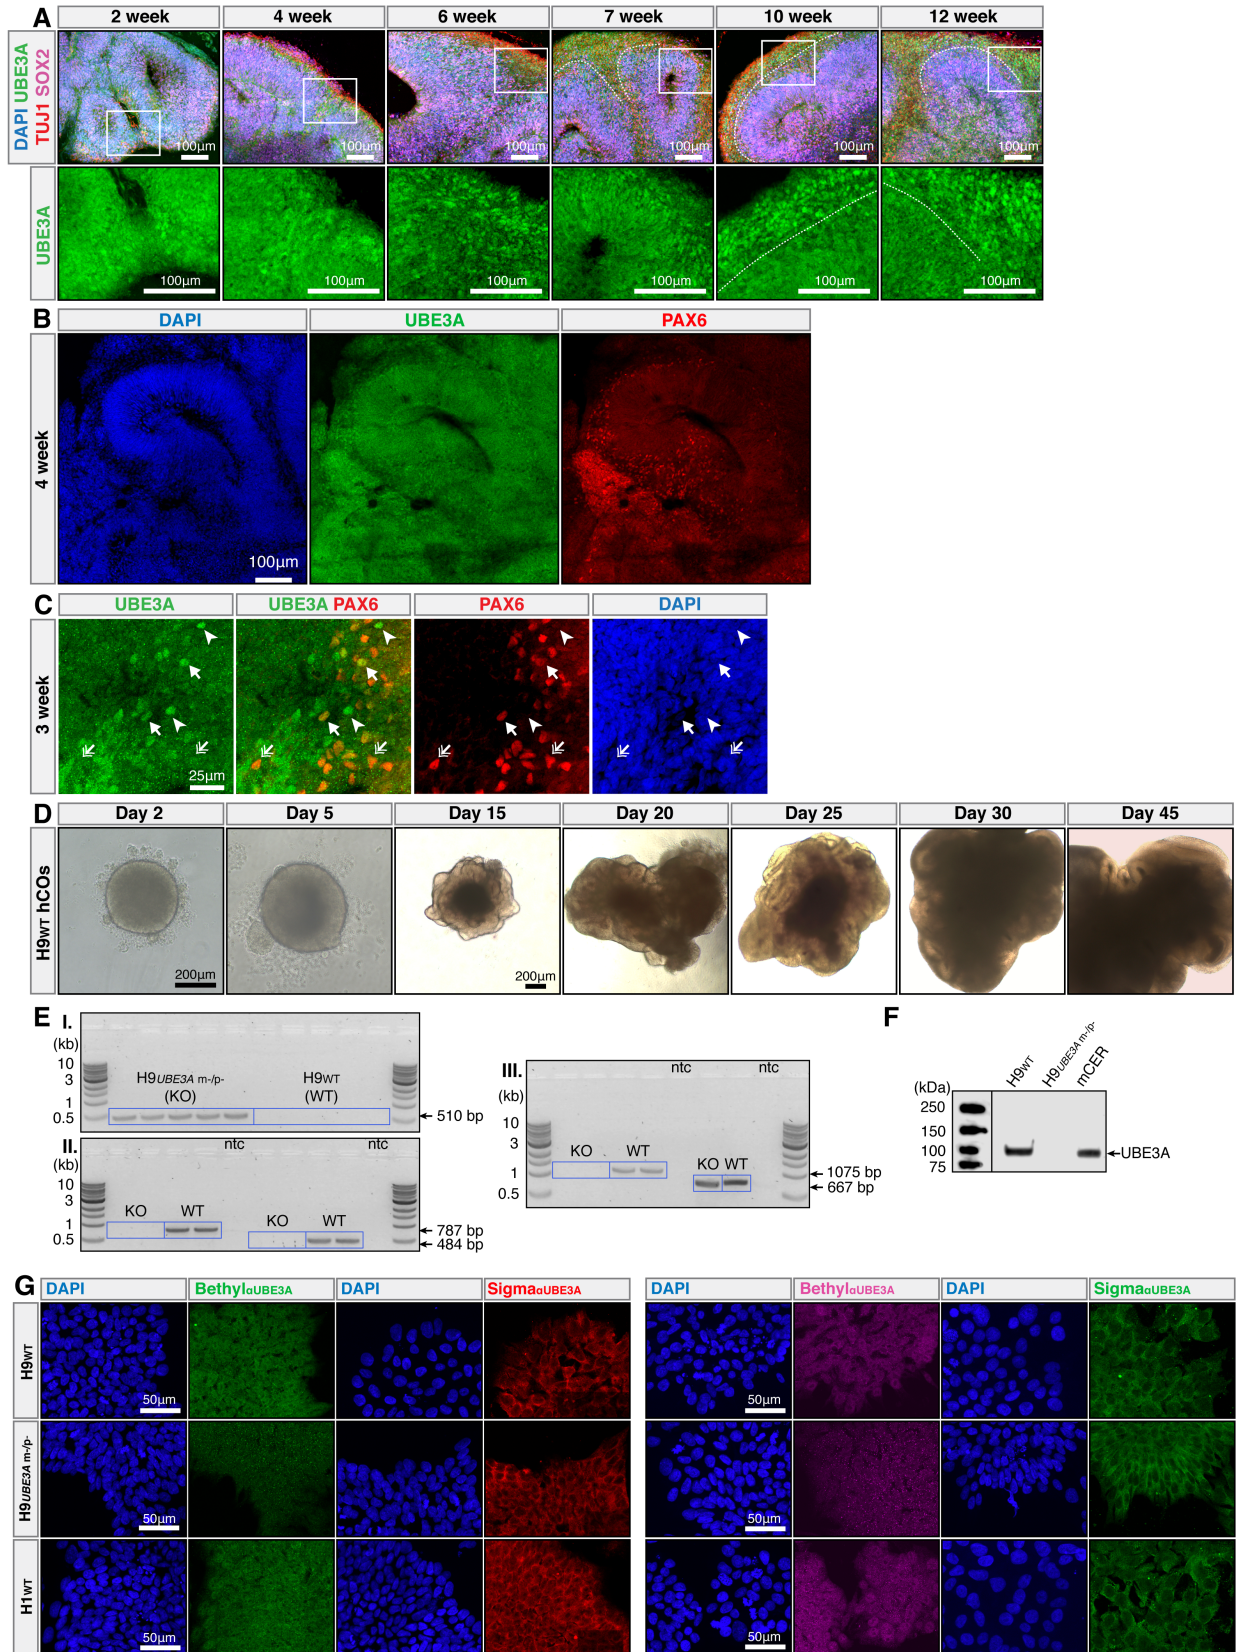

**Figure S1. Additional time-points in hCO development revealing the weak to strong nuclear UBE3A transition in neurons and antibody validation experiments, Related to Figure1.**

(A) Immunostaining time course of neurotypical H9-derived hCO neurodevelopment. Dotted white lines delineate boundaries between TUJ1+ and SOX2+ cells. (B) Low magnification images showing PAX6 progenitor organization (C) Strong (arrows) and weak (double arrows) nuclear UBE3A in PAX6+ cells. Strong nuclear UBE3A in PAX6- /weak cells (arrow heads). (D) Macroscopic brightfield images showing overall H9 hCO development. (F-G) Validation of the H9<sup>UBE3Am-/p-</sup> cell line. (E) PCR using genomic DNA as template. Primers targeting the junction at the deletion site (I), primers targeting intronic regions in the deleted region (II, III-left), primers targeting intronic *TBP* (III-right). (F) Immunoblot analysis of UBE3A in whole cell lysates of H9<sup>WT</sup>, H9<sup>UBE3Am-/p-</sup> hESCs and cerebellum of C57BL/6 mouse (mCER). (G) Immunostaining of H9<sup>WT</sup>, H9<sup>UBE3Am-/p-</sup>, H1 hESCs and hiPSCs with two different UBE3A antibodies (Bethyl Laboratories A300-351A and Sigma Aldrich SAB1404508) and with two different secondary antibody sets (Right panel: rabbit488 and mouse 546. Left panel: rabbit647 and mouse488). SAB1404508 showed higher background staining in human pluripotent cells compared to mouse sections (data not shown).

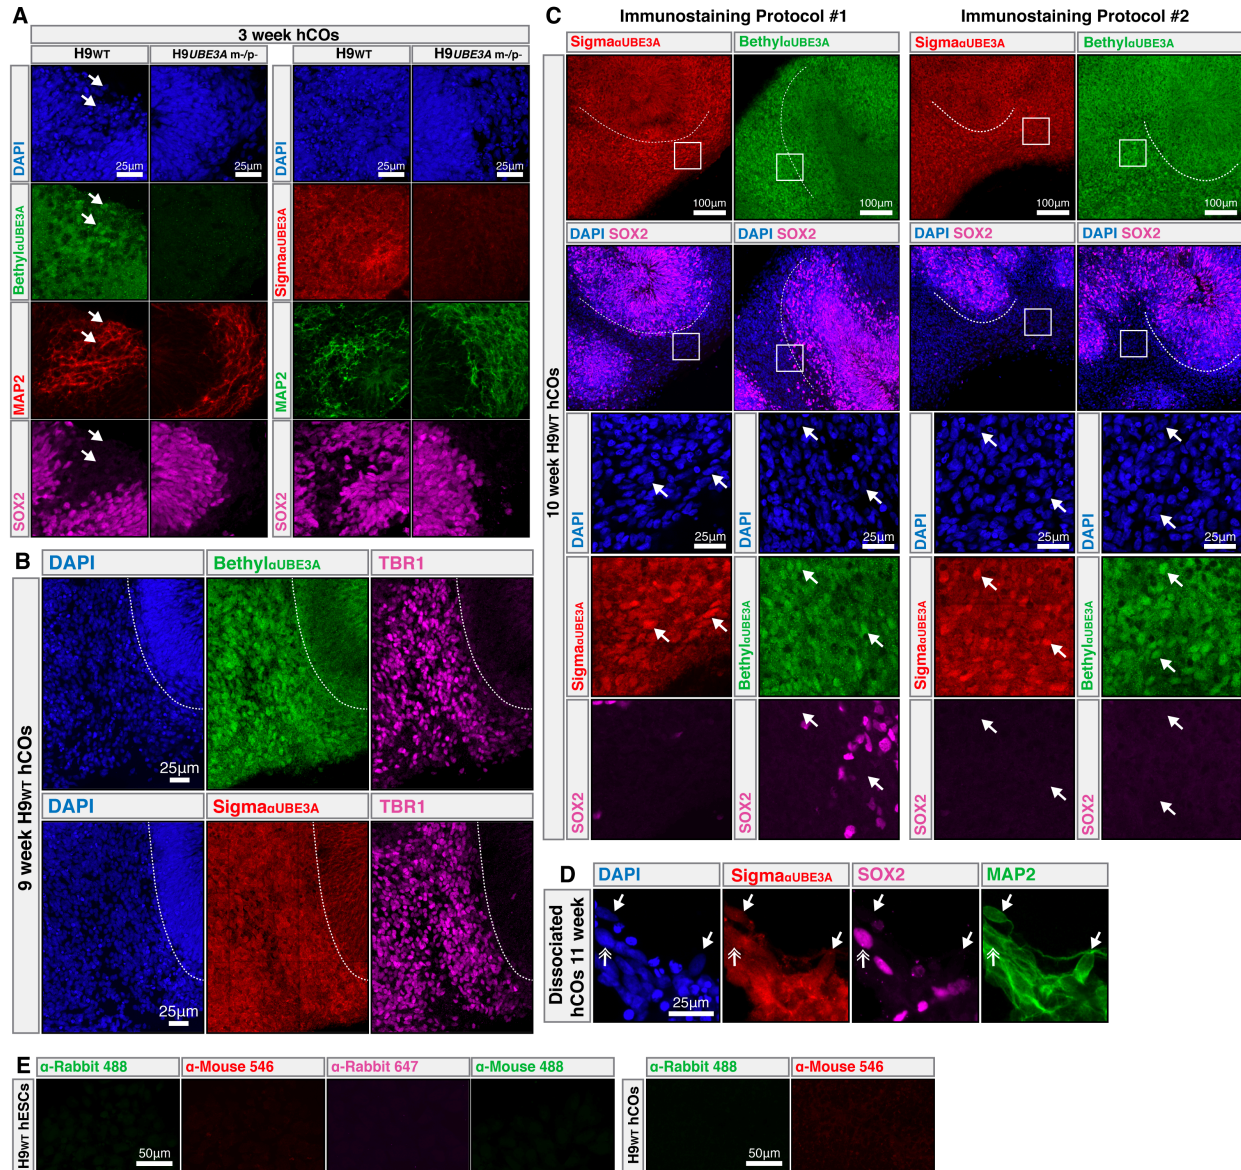

**Figure S2. Additional UBE3A antibody and immunostaining protocol validation, Related to Figure 1.**

(A) H9<sup>WT</sup> and H9<sup>UBE3A<sup>m/p</sup></sup>- derived organoids immunostained with two different UBE3A antibodies (Bethyl Laboratories A300-351A and Sigma Aldrich SAB1404508). Nuclear UBE3A in neurons (arrows). (B) Immunostaining images of 9 week H9<sup>WT</sup> hCOs comparing Sigma and Bethyl UBE3A antibody staining patterns. Dotted white lines delineate the boundaries of TBR1<sup>+</sup> neuronal regions. (C) Comparison of two distinct but similar immunostaining protocols. Protocol 1: Keung Lab protocol described in experimental procedures. Protocol 2: Described previously by Judson and colleagues (Judson et al., 2014). Dotted white lines delineate the boundaries of SOX2<sup>+</sup> progenitor regions. Nuclear UBE3A in potentially neuronal regions (arrows). (D) 2D immunostaining of dissociated H9 hCOs with Sigma UBE3A antibody (SAB1404508). Nuclear UBE3A in neurons (arrows), weaker diffuse staining in progenitors (double arrows). (E) H9 hESCs and H9 hCOs immunostained with secondary antibodies only.

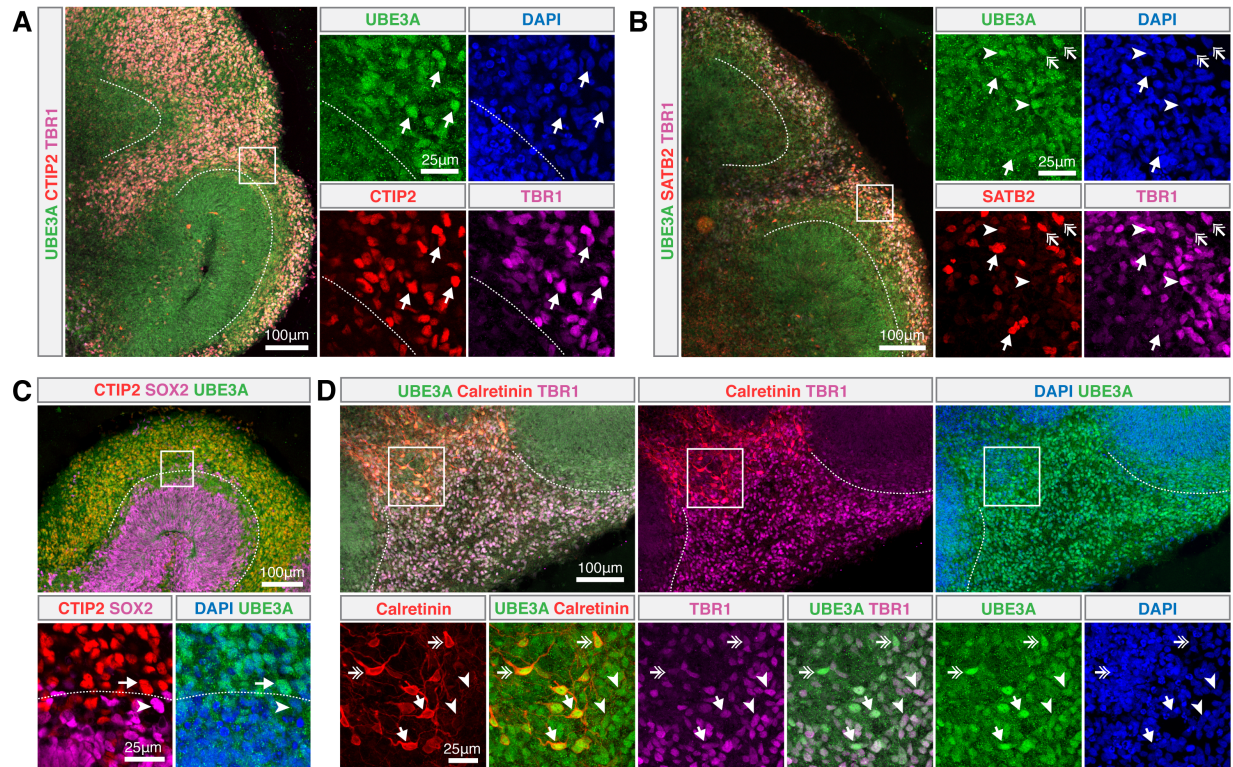

**Figure S3. UBE3A in cerebral cortex-like regions and progenitor zones, Related to Figure2.**

(A-D) UBE3A in cortical cells in neurotypical hCOs. (A, arrows) CTIP2, TBR1 and strong nuclear UBE3A co-localize. (B) Strong nuclear UBE3A in TBR1+/SATB2+ (double arrows) and TBR+/SATB2- (arrow heads) cells. The signal from UBE3A in the nuclei is weaker in TBR1-/SATB2+ (arrows) cells. (C) Strong nuclear UBE3A in CTIP2+ neurons (arrow). Weaker nuclear UBE3A in SOX2+ progenitors (arrow head). (D) Strong nuclear UBE3A in TBR1+/Calretinin+ (arrows), TBR1weak/Calretinin+ (double arrows) and TBR+/Calretinin- (arrow heads) cells.

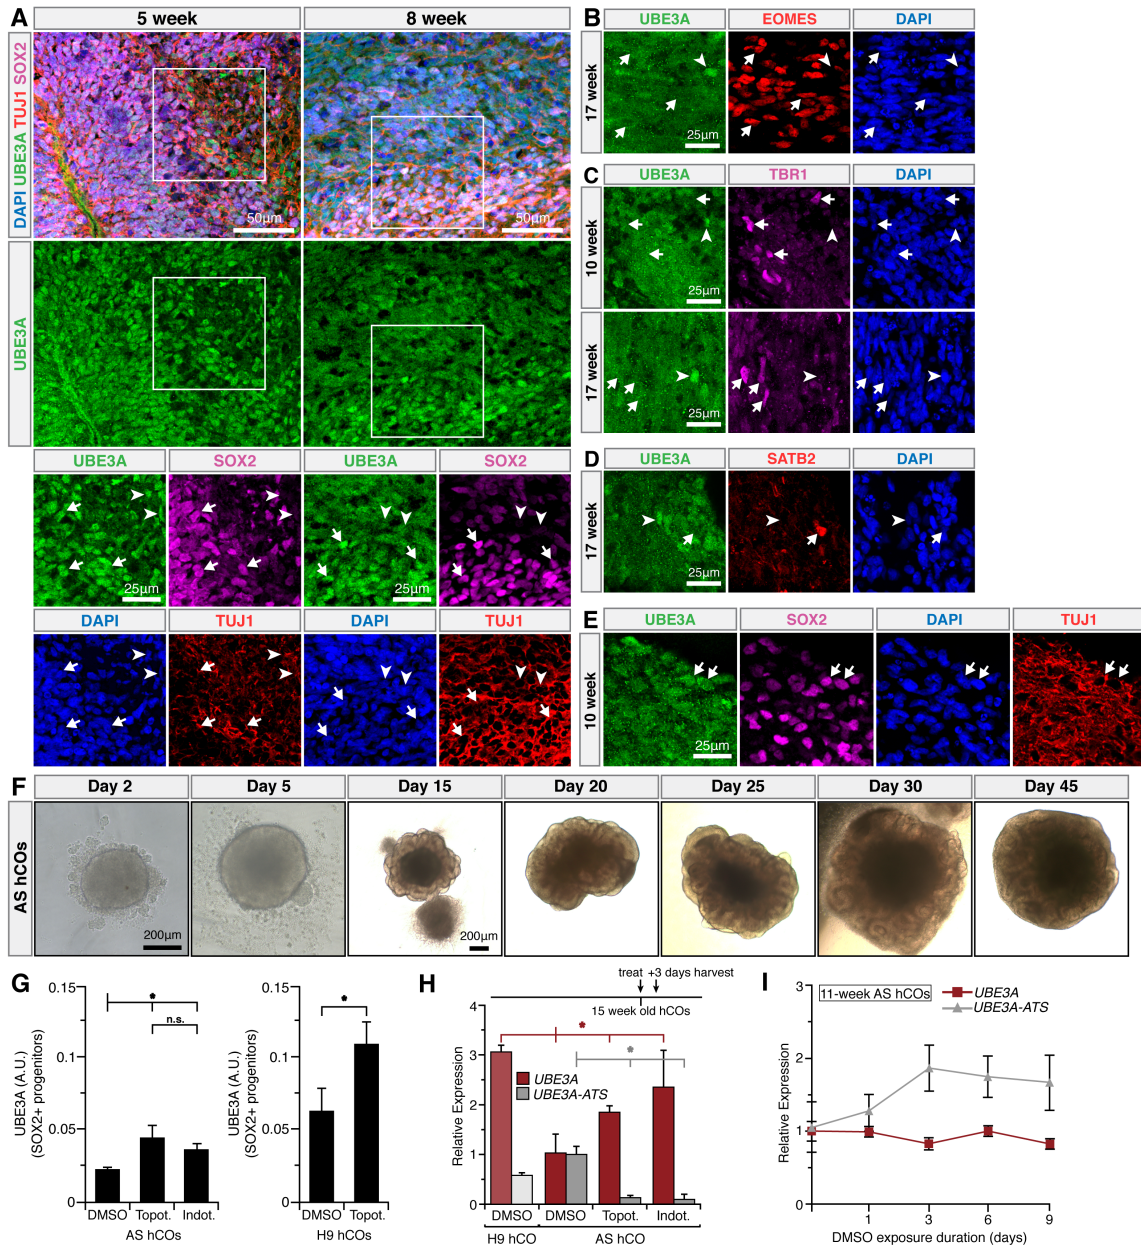

**Figure S4. Paternal UBE3A expression dynamics during AS hCO development and transcriptional and functional responses to topoisomerase inhibitors, Related to Figures 3 and 4.**

(A) Strong nuclear UBE3A in 5-8 week SOX2+ progenitors (arrows). Strong nuclear UBE3A in TUJ1+/SOX2- neurons at 5 weeks becomes weaker at 8 weeks (arrowheads). (B) Weak nuclear UBE3A in EOMES+ cells (arrows). Strong nuclear UBE3A in some EOMES- cells (arrowhead). (C) Weak nuclear UBE3A in TBR1+ cells (arrows). Strong nuclear UBE3A in some TBR1- cells (arrow heads). (D) Weak nuclear UBE3A in SATB2+ cells (arrow). Strong nuclear UBE3A in some SATB2- cells (arrowhead). (E) Strong nuclear UBE3A in SOX2+/TUJ1+ immature neurons (arrows). (F) Macroscopic brightfield images showing overall AS hCO development. (G) Immunostaining quantification of UBE3A in SOX2+ cells after treatment with topoisomerase inhibitors. (H) *UBE3A* and *UBE3A-ATS* expression in 15 week AS hCOs 3 days after a single drug treatment. (I) *UBE3A* and *UBE3A-ATS* expression after 1-9-days of continuous vehicle (DMSO) treatment in 11 week AS hCOs. Statistics; for (G-I) \* $P < 0.05$ , n.s. not significant, full tick marks compared to half tick marks by one-way ANOVA with Tukey-Kramer post hoc,  $n=3$  independent experiments with 3-5 organoids in each replicate, error bars = 95% confidence intervals. A.U. arbitrary fluorescence units.



## SUPPLEMENTAL EXPERIMENTAL METHODS AND MATERIALS

### Histology and Immunofluorescence

Tissues were fixed in 4% paraformaldehyde for 15min at 4 °C followed by 3 x 10 minute PBS washes. Tissues were allowed to sink in 30 % sucrose overnight and then embedded in 10 % gelatin/7.5 % sucrose. Embedded tissues were frozen in an isopentane bath between -50 and -30 °C and stored at -80 °C. Frozen blocks were cryosectioned to 30- $\mu$ m. For immunohistochemistry, sections were blocked and permeabilized in 0.3 % Triton X-100 and 5 % normal donkey serum in PBS. Sections were incubated with primary antibodies in 0.3 % Triton X-100, 5 % normal donkey serum in PBS overnight at 4 °C in a humidity chamber. Sections were then incubated with secondary antibodies in 0.3 % Triton X-100, 5 % normal donkey serum in PBS for 2h at RT, and nuclei were stained with DAPI (Invitrogen). Slides were mounted using ProLong Antifade Diamond (Thermo Fisher Scientific). Secondary antibodies used were donkey Alexa Fluor 488, 546 and 647 conjugates (Invitrogen, 1:500).

Antibody validation experiments were conducted using *UBE3A* double knock-out H9 cells (H9<sup>*UBE3A* m-/p-</sup>) and hCOs (Figure S1 and S2). Two different commercially available UBE3A antibodies were tested for immunostaining (Sigma-Aldrich, mouse monoclonal, SAB1404508, referred to as Sigma, and Bethyl Laboratories, rabbit polyclonal, A300-351A, referred to as Bethyl). Our results showed that the Sigma antibody had a stronger background signal in the pluripotent stage compared to the Bethyl antibody (Figure S1G). However, once the cells passed the pluripotent stage, both antibodies performed similarly in terms of capturing important localization changes in the cell types of interest (Figure S2A-D). In addition, a very similar, previously described protocol for UBE3A immunostaining with minimal differences was also tested (Judson et al., 2014). The two protocols did not show significant differences (Figure S2C). Immunostaining experiments in the main figures of this work were carried out using the Bethyl antibody.

Images were taken using a Nikon A1R confocal microscope (Nikon Instruments). High magnification images captured using thin (1.5  $\mu$ m) optical sectioning. All samples within experiments were processed at the same time, imaged using the same microscope settings, and adjusted identically for quantification purposes. Quantifications were performed manually except for Figures 4C and S4G, where a CellProfiler pipeline automated the identification first of nuclei using DAPI, then DAPI that were positive for each marker protein, and finally the mean background intensity of UBE3A was subtracted from the nuclear UBE3A intensity. For all quantifications, intensities of all channels were maintained equally across all images. For displayed images, individual channels were balanced equally across the entire image. In manual image quantifications, up to 50 cells from 5 different regions in each hCO were analyzed.

Primary antibodies used in immunostaining experiments are listed below.

| Antigen    | Host    | Supplier            | Cat. No.    | RRID        | Dilution |
|------------|---------|---------------------|-------------|-------------|----------|
| SOX2       | Goat    | R&D systems         | AF2018      | AB_355110   | 1:20     |
| TUJ1       | Mouse   | Sigma Aldrich       | T8578       | AB_1841228  | 1:100    |
| TUJ1       | Rabbit  | Sigma Aldrich       | T2200       | AB_262133   | 1:100    |
| UBE3A      | Rabbit  | Bethyl Laboratories | A300-351A   | AB_185563   | 1:250    |
| UBE3A      | Mouse   | Sigma-Aldrich       | SAB1404508  | AB_10740376 | 1:1000   |
| MAP2       | Mouse   | Millipore Sigma     | M1406       | AB_477171   | 1:250    |
| MAP2       | Rabbit  | Millipore Sigma     | AB5622      | AB_91939    | 1:500    |
| TBR1       | Chicken | Sigma Aldrich       | WH0010716M1 | AB_1843877  | 1:100    |
| EOMES      | Mouse   | R&D systems         | MAB6166     | AB_10919889 | 1:25     |
| CTIP2      | Rat     | Abcam               | ab18465     | AB_2064130  | 1:100    |
| SATB2      | Mouse   | Abcam               | ab51502     | AB_882455   | 1:100    |
| Calretinin | Mouse   | Millipore Sigma     | MAB1568     | AB_94259    | 1:100    |
| Calretinin | Rabbit  | Abcam               | Ab702       | AB_305702   | 1:100    |
| GFP        | Chicken | Abcam               | ab13970     | AB_300798   | 1:500    |

## Preparation of whole cell lysate, nuclear and cytosolic extracts and Immunoblot analysis

The whole cell lysates from H9 (wild type cells), H9<sup>UBE3A m-/p-</sup> (*UBE3A* double KO cells) and mouse cerebellum (mCER) derived from C57BB/6 mouse were prepared as previously described (Drobná et al., 2010). Briefly, tissue of mCER was homogenized and H9 cells lysed in an ice-cold RIPA buffer (50 mM Tris.HCl (pH 7.4), 1% NP-40, 150 mM NaCl, 0.25% Na-deoxycholate, 1 mM EDTA, 1 mM PMSF, 1 mM NaF, and 1X HALT, a cocktail of proteases inhibitors). Lysates were cleared by centrifugation at 10,000 x g. Protein concentrations were determined using BCA assay (ThermoFisher). Equal amount of proteins (35 µg in total) were mixed with 10X Laemmli sample buffer (0.5 M Tris.HCl (pH 6.8), 20% Glycerol, 20% SDS, 0.02% Bromphenol blue, 10% 2-Mercaptoethanol) and incubated at 95 °C for 5 min before separated on 4-15% TGX gel (BioRad). Proteins were transferred onto PVDF membrane (BioRad) and membrane was blocked with 5% non-fat milk (BioRad) in TBS buffer.

The membranes were treated with the following UBE3A antibodies: mouse monoclonal antibody from Sigma (E8655) and rabbit polyclonal antibody from Bethyl Laboratories (A300-351A). β-actin and Lamin B1 were used as a loading control. The antigen-antibody complexes were visualized after incubation with the corresponding HRP-conjugated antibodies and by enhanced chemiluminescence detection (BioRad, Clarity Western ECL Substrate) using Licor Odyssey Fc imaging system.

Nuclear and cytoplasmic extracts were prepared as previously described (Drobná et al., 2003). Organoids in different stages of the development (2-, 6-, and 9-weeks old) were first treated with Accutase (Stem Cell Technologies) to dissociate them into single cells. Samples were collected in duplicate and each replicate comprised 15-25 organoids. Cell suspensions were washed twice with ice-cold DPBS containing 1 mM DTT and 1X HALT inhibitors (Fisher Scientific). Washed organoids were lysed on ice using cytoplasmic extraction buffer (10 mM Tris.HCl (pH 7.4), 60 mM KCl, 1 mM EDTA, 1 mM DTT, 1X HALT) and incubated on ice for 10 min. Igepal CA-630 (Sigma) was added to cell lysate to a final concentration of 1%, vortexed, and centrifuged at 12,000 x g for 5 min at 4 °C. Soluble cytoplasmic extracts (CE) were separated and gently washed with cytoplasmic extraction buffer without Igepal CA-630. Each nuclear fraction was then resuspended in nuclear extraction buffer (20 mM Tris.HCl (pH 8.0), 400 mM NaCl, 1.5 mM MgCl<sub>2</sub>, 25% glycerol, 1 mM DTT, 1X HALT). The nuclear extracts (NE) were kept on ice for 1 hour with occasional vortexing before clarification by centrifugation at 12,000 x g for 5 min at 4 °C. Cytoplasmic and nuclear extracts were stored at -80 °C. The concentration of proteins in extracts were determined by BCA assay (ThermoFisher). 15 µg of protein from CE and NE were combined with Laemmli sample buffer and, after heat denaturation, separated on a 4-15% TGX gel (BioRad). Proteins were transferred onto a PVDF membrane (BioRad) and the membrane was blocked with 5% non-fat milk (BioRad) in TBS buffer.

The membranes were treated with the UBE3A antibody. GAPDH and H3 were used as a loading controls for cytoplasmic and nuclear extracts, respectively. The membranes were visualized by enhanced chemiluminescence detection (BioRad, Clarity Western ECL Substrate) using a LiCor Odyssey Fc imaging system. Calculation of the UBE3A CE/NE ratio was based on the total yield of proteins in each fraction and adjusted to the amount of proteins loaded on the gel. The following formulas were used for evaluation of UBE3A in each fraction and for the UBE3A CE/NE ratio:

$$\Sigma \text{CE (or NE)} = \text{Signal Intensity} \times \frac{\text{Total yield of proteins for CE (or NE)} (\mu\text{g})}{\text{Total proteins loaded to the gel} (15\mu\text{g})}$$

$$\text{Ratio} = \frac{\Sigma \text{CE}}{\Sigma \text{NE}}$$

Immunoblot analysis in this work was completed with the Sigma (E8655) UBE3A antibody due to its better labeling efficiency in this particular analysis (comparison data not shown). Primary and secondary antibody details used in immunoblot analysis are listed below.

| Antigen | Host   | Supplier      | Cat. No. | RRID       | Dilution/Working concentration |
|---------|--------|---------------|----------|------------|--------------------------------|
| UBE3A   | Mouse  | Sigma-Aldrich | E8655    | AB_261956  | 2 µg/ml                        |
| GAPDH   | Mouse  | Calbiochem    | CB1001   | AB_2107426 | 2 µg/ml                        |
| H3      | Rabbit | Abcam         | ab1791   | AB_302613  | 1 µg/ml                        |

|                           |        |                             |          |             |              |
|---------------------------|--------|-----------------------------|----------|-------------|--------------|
| $\beta$ -actin            | Mouse  | Santa Cruz<br>Biotechnology | sc47778  | AB_2714189  | 1:2500       |
| Lamin B1                  | Rabbit | Abcam                       | ab16048  | AB_10107828 | 1 $\mu$ g/ml |
| m-IgG $\kappa$ BP-<br>HRP | Mouse  | Santa Cruz<br>Biotechnology | sc516102 | AB_2687626  | 1:2500       |
| anti-rabbit<br>IgG-HRP    | Mouse  | Santa Cruz<br>Biotechnology | sc2357   | AB_628497   | 1:2500       |

### Transfection of HEK 293FT cells, lentiviral particle production and transduction of human cerebral organoids

To generate lentiviral particles, HEK 293FT cells (ThermoFisher) were seeded on a 6-well plate at a density of  $5.0 \times 10^6$  cells/ml in complete cultured media (DMEM with high glucose containing 10% FBS and non-essential amino acids; Corning). When cells reached 80% confluence, the medium was replaced with Opti-MEM reduced serum medium containing GlutaMax (ThermoFisher) and exposed to 25  $\mu$ M chloroquine diphosphate (Sigma-Aldrich) for 5 hours before being transfected with the plasmid mixture. The plasmid mixture consisted of pLenti-CamKIIa-GFP (Addgene, Plasmid #96941), pCMVR8.74 (packaging plasmid, Addgene, Plasmid #22036), pCMV-VSV-G (envelope plasmid, Addgene, Plasmid #8454), and pAdVantage vector (Promega, E1711) each at 300 fmol. Polyethyleneimine (PEI, Sigma) was used as the transfection reagent at a ratio of 3:1 (PEI:DNA). PEI was combined with the plasmid mixture, incubated for 20 minutes at room temperature, and spread drop-wise over the culture. A fresh media change was performed after 18 hours. Media containing lentiviral particles were harvested 48 and 72 hours post transfection, spun down at 500 g for 5 min and filtered using 0.45  $\mu$ m PES syringe filters (VWR). The particles were concentrated by centrifugation at 2,500 g for 15 min using Amicon Ultra-15 centrifugal filter units (EMDMillipore, UFC910008). Concentrated lentivirus was aliquoted and stored at -80°C. hCOs were transduced by incubating 100 $\mu$ L pLenti-CamKIIa-GFP virus in 1mL cerebral organoid differentiation media for 12 hours.

### RNA extraction and qPCR

hCOs were washed 3 times in cold PBS. Matrigel was dissolved by incubating the hCOs in chilled Cell Recovery Solution (Corning, cat. no. 354253) for 1h at 4 °C. The dissolved Matrigel was removed by rinsing 3 times in cold PBS. Total RNA was isolated using Direct-zol RNA MicroPrep Kit (Zymo Research) according to the manufacturer's protocol. RNA samples were collected in 2mL RNase-free tubes and chilled on ice throughout the procedure. cDNA synthesis was performed using 900 ng of total RNA and the iScript Reverse Transcription Kit (BIO-RAD) according to the manufacturer's protocol. qPCR reactions were performed using IQ Multiplex Powermix (BIO-RAD) on a BIO-RAD 384-well machine (CXF384) with PrimePCR probe assays (BIO-RAD). Unique assay IDs for *UBE3A* primers and probe: qHsaCIP0031486. Primer pairs and probes for *UBE3A-ATS* (RT-17 designed by Runte and colleagues) (Runte et al., 2001), *HPRT* and *TBP* were custom designed and are listed below. Individual primer pairs and probes were tested before multiplexing reactions. Analysis of *UBE3A* and *UBE3A-ATS* expression along with two reference genes *TBP* and *HPRT* was performed in triplicate using Excel by calculating the  $\Delta\Delta C_t$  value. Data are presented as expression level ( $2^{-\Delta\Delta C_t}$ ) relative to *TBP* or *HPRT*. For each qPCR sample, 3 independent experiments (n=3) with 3-5 organoids in each replicate from different culture dishes were collected.

Primers used in RT-qPCR experiments are listed below.

| Target           | Gene ID   | Forward primer              | Reverse primer              | Probe                              | Amplicon size |
|------------------|-----------|-----------------------------|-----------------------------|------------------------------------|---------------|
| <i>UBE3A-ATS</i> | 104472715 | GGCACTGAAAAT<br>GTGGCATCCAG | GGTGTGTCAGCT<br>GTGCTGGTGTC | AGCCAAAGAGTACTC<br>TTCTCAGTCATCCT  | 120           |
| <i>TBP</i>       | 6908      | GGGCACTACTCC<br>ACTGTATC    | CGAAGTGCAATG<br>GTCTTTAGG   | ATGACTCCCATGACC<br>CCCATCACTCCT    | 100           |
| <i>HPRT</i>      | 3251      | TGACACTGGCAA<br>AACAAATGCA  | GGTCCTTTTCAC<br>CAGCAAGCT   | TGCTTTTCCTTGGTCAG<br>GCAGTATAATCCA | 94            |

## SUPPLEMENTAL REFERENCES

Drobná, Z., Jaspers, I., Thomas, D.J., and Stýblo, M. (2003). Differential activation of AP-1 in human bladder epithelial cells by inorganic and methylated arsenicals. *FASEB J.* *17*, 67–69.

Drobná, Z., Walton, F.S., Paul, D.S., Xing, W., Thomas, D.J., and Stýblo, M. (2010). Metabolism of arsenic in human liver: The role of membrane transporters. *Arch. Toxicol.* *84*, 3–16.

Runte, M., Hüttenhofer, A., Groß, S., Kiefmann, M., Horsthemke, B., and Buiting, K. (2001). The IC-SNURF–SNRPN transcript serves as a host for multiple small nucleolar RNA species and as an antisense RNA for UBE3A. *Hum. Mol. Genet.* *10*, 2687–2700.
